# 1 **Ring Finger Protein 213 Assembles into a Sensor for ISGylated Proteins with Antimicrobial** 2 **Activity**

3 Fabien Thery<sup>1,2,\*</sup>, Lia Martina<sup>1,2,\*</sup>, Caroline Asselman<sup>1,2,\*</sup>, Heidi Repo<sup>1,2</sup>, Yifeng Zhang<sup>3</sup>, Koen Sedeyn<sup>1,4</sup>,  
4 George D. Moschonas<sup>1,4</sup>, Clara Bredow<sup>5</sup>, Qi Wen Teo<sup>6</sup>, Jingshu Zhang<sup>6</sup>, Madeleine Vessely<sup>3</sup>, Kevin  
5 Leandro<sup>1,2</sup>, Denzel Eggermont<sup>1,2</sup>, Delphine De Sutter<sup>1,2</sup>, Katie Boucher<sup>1,2,7</sup>, Tino Hochepped<sup>8,9</sup>, Nele  
6 Festjens<sup>1,4</sup>, Nico Callewaert<sup>1,4</sup>, Xavier Saelens<sup>1,4</sup>, Bart Dermaut<sup>2,10</sup>, Klaus-Peter Knobloch<sup>11</sup>, Antje  
7 Beling<sup>5,12</sup>, Sumana Sanyal<sup>6,13</sup>, Lilliana Radoshevich<sup>3,#</sup>, Sven Eyckerman<sup>1,2,#</sup>, Francis Impens<sup>1,2,7,#</sup>

8 <sup>1</sup> VIB-UGent Center for Medical Biotechnology, VIB, Ghent, Belgium

9 <sup>2</sup> Department of Biomolecular Medicine, Ghent University, Ghent, Belgium

10 <sup>3</sup> Department of Microbiology and Immunology, University of Iowa Carver College of Medicine, Iowa City, USA

11 <sup>4</sup> Department of Biochemistry and Microbiology, Ghent University, Ghent, Belgium

12 <sup>5</sup> Charité - Universitätsmedizin Berlin, corporate member of Freie Universität Berlin, Humboldt-Universität zu Berlin,  
13 and Berlin Institute of Health (BIH), Institute of Biochemistry, Berlin, Germany

14 <sup>6</sup> HKU-Pasteur Research Pole, School of Public Health, University of Hong Kong, Hong Kong

15 <sup>7</sup> VIB Proteomics Core, VIB, Ghent, Belgium

16 <sup>8</sup> VIB Center for Inflammation Research, VIB, Ghent, Belgium

17 <sup>9</sup> Department of Biomedical Molecular Biology, Ghent University, Ghent, Belgium

18 <sup>10</sup> Center for Medical Genetics, Ghent University Hospital, Ghent, Belgium

19 <sup>11</sup> Institute of Neuropathology, Medical Faculty, University of Freiburg, Freiburg, Germany

20 <sup>12</sup> Deutsches Zentrum für Herz-Kreislauf-Forschung (DZHK), partner site Berlin

21 <sup>13</sup> Sir William Dunn School of Pathology, University of Oxford, Oxford OX1 3RE

22

23 \* These authors contributed equally to this work

24

25 # Correspondence: Francis Impens  
26 Tel: +32 9 224 98 37  
27 E-mail: [francis.impens@vib-ugent.be](mailto:francis.impens@vib-ugent.be)

28 Sven Eyckerman  
29 Tel: +32 9 224 98 31  
30 E-mail: [sven.eyckerman@vib-ugent.be](mailto:sven.eyckerman@vib-ugent.be)

31 Lilliana Radoshevich  
32 Tel: + 1-319-335-7818  
33 E-mail: [lilliana-radoshevich@uiowa.edu](mailto:lilliana-radoshevich@uiowa.edu)

34

35

36

37 **ABSTRACT**

38 ISG15 is an interferon-stimulated, ubiquitin-like protein that can conjugate to substrate proteins  
39 (ISGylation) to counteract microbial infection, but the underlying mechanisms remain elusive. Here, we  
40 used a viral-like particle trapping technology to identify ISG15-binding proteins and discovered Ring  
41 Finger Protein 213 (RNF213) as an ISG15 interactor and cellular sensor of ISGylated proteins. RNF213 is  
42 a poorly-characterized, interferon-induced megaprotein that is frequently mutated in Moyamoya disease, a  
43 rare cerebrovascular disorder. We found that interferon induces ISGylation and oligomerization of RNF213  
44 on lipid droplets, where it acts as a sensor for ISGylated proteins. We showed that RNF213 has broad  
45 antimicrobial activity *in vitro* and *in vivo*, counteracting infection with *Listeria monocytogenes*, herpes  
46 simplex virus 1 (HSV-1), human respiratory syncytial virus (RSV) and coxsackievirus B3 (CVB3), and we  
47 observed a striking co-localization of RNF213 with intracellular bacteria. Together, our findings provide  
48 novel molecular insights into the ISGylation pathway and reveal RNF213 as a key antimicrobial effector.

49 **KEYWORDS**

50 ISG15, RNF213, ubiquitin-like modification, Moyamoya, lipid droplets, *Listeria*, RSV, coxsackievirus,  
51 herpes simplex virus, Virotrap

## 52 INTRODUCTION

53 ISG15 is a ubiquitin-like (UBL) protein with antimicrobial activity. Similar to ubiquitin, ISG15 conjugates  
54 via its C-terminus to lysine residues of substrate proteins in a process called ISGylation, which is mediated  
55 by an E1 enzyme, UBE1L, an E2 enzyme, UBCH8, and three known E3 enzymes, HHARI, TRIM25 and  
56 HERC5<sup>1-5</sup>. ISG15 and its conjugation machinery are strongly upregulated by Type I and III interferon,  
57 viral nucleic acids<sup>1</sup>, bacterial DNA<sup>6</sup> and lipopolysaccharide (LPS)<sup>7</sup>. ISG15 has potent antiviral effects  
58 both *in vitro* and *in vivo*<sup>8</sup>. In fact, mice which lack ISG15 are unable to control various viral pathogens  
59 including clinically relevant etiologic agents such as Influenza<sup>9</sup>, human respiratory syncytial virus<sup>10</sup> and  
60 coxsackievirus<sup>11,12</sup>. ISG15's crucial antiviral role is bolstered by the variety of viral evasion strategies  
61 targeting the ISGylation pathway, either by interfering with ISG15 conjugation<sup>1,13</sup> or by expressing ISG15-  
62 specific proteases that lead to reversible<sup>14-17</sup> or irreversible deconjugation<sup>18</sup>. In addition to its antiviral role,  
63 ISG15 can also act as an antibacterial effector against intracellular bacterial pathogens such as *Listeria*  
64 *monocytogenes*<sup>6</sup> and *Mycobacterium tuberculosis*<sup>19</sup> and it can restrict the intracellular eukaryotic pathogen  
65 *Toxoplasma gondii*<sup>20</sup>. Despite its broad antimicrobial role, the molecular mechanisms by which ISG15  
66 modification is sensed and how it protects against microbial infections remain largely undefined. One model  
67 posits that the antiviral function of ISG15 is based on the localization of the E3 ligase HERC5 at the  
68 ribosome. According to this model, proteins are co-translationally modified by ISG15 during infection,  
69 thereby interfering with the function of newly translated viral proteins in a non-specific manner<sup>21</sup>.  
70 However, the model does not predict what subsequently happens to ISGylated proteins in the cell and how  
71 they are recognized and trafficked.

72 Unlike ubiquitin, ISG15 does not solely exert its antimicrobial function by covalently conjugating to target  
73 proteins. It can also be secreted and act as a cytokine<sup>22-24</sup> and can non-covalently interact with viral and  
74 host proteins<sup>25</sup>. Relatively little is known about what interaction partners bind ISG15 and how the functions  
75 of these interactions contribute to host responses to pathogens. Indeed, only a few host proteins have been  
76 reported to non-covalently bind to ISG15, mainly in its free form. One of the best-characterized ISG15-  
77 binding proteins is USP18, the predominant ISG15 deconjugating protease in human and mice<sup>26,27</sup>. In  
78 addition to its enzymatic activity, USP18 functions as a major negative regulator of type 1 interferon (IFN-  
79 I) signaling by binding to one of the subunits of the interferon  $\alpha/\beta$  receptor (IFNAR2)<sup>28-30</sup>. In order to  
80 prevent IFN-I over-amplification in humans, USP18 needs to be stabilized by binding to free ISG15 in a  
81 non-covalent manner. Hence, patients who lack ISG15 expression due to a frame-shift mutation have a  
82 strong upregulation of the IFN-I pathway leading to an Aicardi-Goutières-like interferonopathy<sup>31</sup>. In  
83 contrast to *isg15*-deficient mice, these patients do not display enhanced susceptibility to viral infection,  
84 instead they are susceptible to bacterial infection including clearance of the attenuated tuberculosis vaccine,  
85 Bacille Calmette-Guerin (BCG)<sup>32</sup>. In addition to USP18, a few other proteins have been reported to interact

86 with ISG15 in a non-covalent manner. Free intracellular ISG15 can bind to leucine-rich repeat-containing  
87 protein 25 (LRRC25) and mediate the autophagic degradation of retinoic acid-inducible gene I protein  
88 (RIG-I/DDX58)<sup>33</sup>. Upon forced overexpression, p62 and HDAC6 were further shown to interact with the  
89 C-terminal LRLRGG sequence of ISG15 (and ISGylated proteins)<sup>34</sup>. Free ISG15 also interacts with the E3  
90 ligase NEDD4 and ISG15 overexpression disrupts NEDD4 ubiquitination activity thus blocking the  
91 budding of Ebola virus-like particles<sup>35,36</sup>. Likewise, free ISG15 was reported to interact in a non-covalent  
92 manner with the Hypoxia inducible factor 1 $\alpha$  (HIF1 $\alpha$ ), preventing its dimerization and downstream  
93 signaling<sup>37</sup>.

94 ISG15 has not been studied as extensively as ubiquitin or SUMO for which interacting domains or motifs  
95 have been reported, thus to date no such domains or motifs have been described for ISG15. Although  
96 affinity purification mass spectrometry (AP-MS) and yeast-two-hybrid (Y2H) screens were performed with  
97 ISG15 as bait, these interactome screens were hampered by the inherently limited binding surface of such  
98 a small protein and the stringency of yeast two-hybrid, which would preclude low affinity interactions<sup>38-41</sup>.  
99 Therefore, we endeavored to identify non-covalent interaction partners of ISG15 using a recently-developed  
100 approach named Virotrap, which is based on capturing protein complexes within virus-like particles (VLPs)  
101 that bud from mammalian cells<sup>42</sup>. Virotrap is a cell lysis-free method and thus preserves existing protein  
102 complexes, and, importantly, this method is uniquely suited to capture weak and transient cytosolic  
103 interactions that otherwise do not survive protein complex purification. Using this technology, we  
104 systematically mapped the non-covalent interactome of ISG15 in human cells. We identified a rich  
105 interactome but for further study focused on a very-large protein, called Ring Finger Protein 213 (RNF213),  
106 mutations in which predisposes patients to early cerebrovascular events. Further biochemical evaluation  
107 confirmed the selective binding of RNF213 to ISG15 and showed that IFN-I signaling induces RNF213  
108 oligomerization into a sensor for ISGylated proteins associated with lipid droplets. Finally, *in vitro* and *in*  
109 *vivo* loss and gain of function experiments showed that RNF213 is a pivotal, broadly acting microbial  
110 restriction factor that colocalizes to the surface of intracellular bacteria.

## 111 RESULTS

### 112 Identification of RNF213 as an ISG15-binding protein by Virotrap

113 To investigate the non-covalent interactome of ISG15 and cytosolic sensors for ISG15 modification, we  
114 used Virotrap, a recently developed MS-based approach to map protein-protein interactions<sup>42</sup>. Briefly, the  
115 sequence of mature ISG15 (ending on -LRLRGG) was genetically fused via its N-terminus to the GAG  
116 protein of HIV-1 and expressed in HEK293T cells treated with IFN-I. Expression of the GAG-ISG15 fusion  
117 protein led to self-assembly of VLPs internally coated with ISG15. After budding from the cells and  
118 capturing ISG15 interaction partners, VLPs were collected from the cell culture supernatants and used for



119 MS-based protein identification (Fig. 1A). To distinguish specific ISG15-binding proteins from non-  
120 specific (GAG-binding) proteins, the experiment was performed in a quantitative fashion comparing ISG15  
121 VLPs with VLPs containing dihydrofolate reductase from *Escherichia coli* (eDHFR), a non-specific bait  
122 protein with no obvious interaction partners in human cells. In addition to ISG15, we identified RNF213 as  
123 the most enriched protein in the ISG15 VLPs, associated with high spectral and peptide counts (Fig. 1B,  
124 Table S1). Of note, among several less enriched proteins we also identified USP18, which is an ISG15  
125 specific isopeptidase and thus a well-known interaction partner of ISG15<sup>26,27</sup>. To rule out any type of  
126 covalent interaction between GAG-ISG15 and RNF213, we repeated the Virotrap experiment using the  
127 non-conjugatable ISG15AA (with the c-terminal glycines mutated to alanines: LRLRAA) and precursor  
128 variants of ISG15, both with and without IFN-I treatment (Supplementary Fig. 1, Table S1). Without  
129 exception, in all conditions we identified RNF213 as the most enriched protein in the ISG15 VLPs. We also  
130 confirmed the presence of RNF213 in the ISG15 VLPs by western blotting (Fig. 1C).

131 In addition to RNF213, 28 other proteins were enriched in ISG15 VLPs under all conditions  
132 (Supplementary Fig. 1, Table S1). Following RNF213, the most notable among these identifications was  
133 the valosin-containing protein (VCP/p97). VCP is a hexameric AAA+ ATPase with a central role in the  
134 endoplasmic-reticulum-associated protein degradation (ERAD) pathway, where it associates with cofactor  
135 proteins to facilitate the proteasomal degradation of misfolded proteins<sup>43</sup>. In addition, several cofactors of  
136 VCP were found to interact with ISG15 such as the VCP-UFD1-NPL4 protein complex as well as PLAA,  
137 UBXN6 and YOD1<sup>44</sup>, FAF1, NSFL1C, UBXN1 and RNF115<sup>45-48</sup>. We also detected several components  
138 of the proteasome complex enriched in ISG15 VLPs, including ADRM1 and several PSMA and PSMB  
139 subunits of the proteasome. Moreover, we identified TAB1 and TAK1 (MAP3K7) which are involved in  
140 innate immune signaling pathways as well as TRAFD1<sup>49,50</sup>.

141 We then performed an additional series of Virotrap-MS experiments in which only the N- or C-terminal  
142 domain of ISG15 was fused to GAG, alongside with full length ISG15 and eDHFR as positive and negative  
143 controls, respectively. None of the VLPs with the N- or C-terminal ubiquitin-like domain of ISG15 could  
144 enrich RNF213, suggesting that both domains are required for the interaction with RNF213 (Supplementary  
145 Fig. 2A-C). Like for RNF213, the majority of the 28 aforementioned ISG15 interaction partners also  
146 required both domains to interact (Supplementary Fig. 2D), suggesting that these proteins might interact  
147 indirectly with ISG15 through binding to RNF213. Taken together, our Virotrap screens identified RNF213  
148 as a novel, robust non-covalent interaction partner of ISG15 along with a number of VCP and proteasome-  
149 associated proteins, all requiring both the N- and C-terminal domains of ISG15 to interact.

### 150 **RNF213 binds ISG15 but not ubiquitin or SUMO**

151 To confirm the interaction and specificity between ISG15 and RNF213 through an alternative approach,  
152 we first carried out classic immunoprecipitation-MS experiments in IFN-I treated HEK293T and HeLa cells

153 expressing HA-tagged-ISG15AA. In line with previous reports<sup>38-40</sup>, HA-pull down of ISG15 did not reveal  
154 RNF213 nor any other significant interaction partners (Supplementary Fig. 3A-C). This suggested that  
155 affinity between a single ISG15 molecule and RNF213 is too weak to detect, similar to ubiquitin or SUMO  
156 molecule to their respective binding proteins<sup>51,52</sup>. Hence, we applied a Glutathione-S-Transferase (GST)  
157 pull down assay in which we coated glutathione beads with GST-ISG15 and then used these ISG15-  
158 decorated beads to search for ISG15 binding proteins in a lysate of HEK293T, HeLa and THP-1 cells treated  
159 with IFN-I. GST-coated beads were used as control and interacting proteins were identified by mass  
160 spectrometry. Interestingly, this approach yielded RNF213 as a strongly enriched partner of ISG15 along  
161 with several other interactors (Fig. 1D-F), however, only RNF213 was identified in both the GST  
162 enrichment and the Virotrap experiments (Supplementary Fig. 3D). Among the other interactors, we  
163 detected UBE1L (UBA7) and HDAC6 which are known ISG15 binders in THP-1 and HEK293T cells,  
164 respectively<sup>1,34</sup>. To further confirm the specificity of the ISG15/RNF213 interaction, we next combined the  
165 pull down of GST-ISG15 with western blotting. In these experiments, a lysate of HEK293T cells expressing  
166 FLAG-RNF213 was mixed with glutathione beads bound to GST-ISG15, GST-SUMO or GST-ubiquitin.  
167 While RNF213 clearly binds to GST-ISG15, only background binding could be observed to GST-SUMO  
168 and GST-ubiquitin (Fig. 1G). As a positive control, we confirmed binding of RNF4 and RNF31, known  
169 binding partners of GST-SUMO and GST-ubiquitin, respectively<sup>51,53</sup> (Fig. 1H-I). Together, these data show  
170 that RNF213 specifically binds ISG15, rather than ubiquitin or SUMO.

### 171 **RNF213 binds ISGylated proteins on lipid droplets**

172 RNF213, also known as mysterin, is a multidomain megaprotein of unknown function. Polymorphisms in  
173 *RNF213* predispose human patients to Moyamoya disease (MMD), a rare vascular brain disease leading to  
174 stroke, but the underlying molecular mechanisms of this disease remain elusive<sup>54</sup>. The most abundant  
175 RNF213 isoform is 5,207 amino acids long and is comprised of two adjacent AAA+ ATPase modules with  
176 a RING domain<sup>55</sup>. RNF213 is expressed in most cells and tissues<sup>56</sup>, but levels can be upregulated by  
177 immune and inflammatory signaling<sup>55</sup>. AAA+ proteins typically assemble into hexameric toroidal  
178 complexes that generate mechanical force through ATP binding/hydrolysis cycles. In the case of RNF213,  
179 complex formation is dynamic and driven by ATP binding while ATP hydrolysis mediates disassembly<sup>55</sup>.  
180 Interestingly, a recent microscopy study showed co-localization of RNF213 and lipid droplets (LDs),  
181 suggesting a model in which monomeric RNF213 is directly recruited from the cytosol and ATP binding  
182 drives its oligomerization on the surface of lipid droplets<sup>57</sup>. This model, together with the observation that  
183 ISG15 binds RNF213 in Virotrap and GST pull down experiments - which both present multiple ISG15  
184 bait molecules in close proximity on a concave or convex surface, respectively (Fig. 1A) - led us to  
185 hypothesize that RNF213 oligomerizes on LDs into a binding platform for ISG15 and potentially multiply  
186 ISGylated proteins.

187 To test this hypothesis, we first verified whether RNF213 can bind ISGylated proteins. To this end, we  
188 pulled down FLAG-RNF213 from lysates of HEK293T cells expressing HA-tagged ISG15 or ISG15AA  
189 and its conjugation machinery to induce ISGylation. Western blotting against the HA-tag revealed a smear  
190 of ISGylated proteins after FLAG-RNF213 pulldown, but not with FLAG-eGFP pulldown or when  
191 ISG15AA was expressed (Fig. 2A). We repeated the experiment with eGFP-tagged RNF213  
192 (Supplementary Fig. 4A) and in both cases did not observe any free ISG15 or ISG15AA associated with  
193 RNF213, indicating that in cells RNF213 indeed preferentially senses and binds ISGylated proteins rather  
194 than free ISG15. In order to determine whether the ISGylated proteins detected were instead partially  
195 degraded RNF213 we included a 1% SDS wash, which reduced the ISGylated proteins (Supplementary  
196 Fig. 4B) and even demonstrated that RNF213 could bind ISGylated proteins in trans which originated from  
197 a different cell lysate (Supplementary Fig. 4C-D). These data indicate that RNF213 does bind ISGylated  
198 proteins. Finally, we also showed that this binding was ISG15 specific, since ubiquitinated proteins were  
199 not enriched (Supplementary Fig. 4E), in line with the results from the GST-pull down (Fig. 1G).

200 We next tested whether the interaction between RNF213 and ISGylated proteins occurs on LDs. In HeLa  
201 cells treated with IFN-I we observed occasional co-localization of overexpressed eGFP-RNF213 with  
202 endogenous ISG15 by fluorescence microscopy, however, ubiquitous intracellular distribution of free  
203 ISG15 prevented reliable quantitation of these events (data not shown). We therefore verified this question  
204 further biochemically using macrophages, a cell type which is more relevant for innate immune signaling.  
205 We isolated LDs from THP-1 cells and primary human monocytes by flotation on a sucrose gradient <sup>58</sup>.  
206 Western blotting for RNF213 and LD marker proteins such as PLIN1 and PLIN2 confirmed that in THP-1  
207 cells the majority of RNF213 is associated with LDs, while a minor fraction is in the cytosol (Supplementary  
208 Fig. 5A). Upon IFN-I treatment, the fraction of RNF213 associated with LDs further increased, along with  
209 a striking appearance of a smear of ISGylated proteins, an observation that was corroborated in primary  
210 human monocytes (Fig. 2B). Finally, to show that ISGylated proteins associate with LDs via RNF213, we  
211 repeated the experiment in THP-1 cells in which we reduced the expression of RNF213 by siRNA. As  
212 expected, knockdown of RNF213 markedly reduced association of ISGylated proteins with LDs and this  
213 occurred without any apparent loss of lipid droplet stability as indicated by unchanged levels of LD markers  
214 PLIN1, PLIN2 and ATGL (Fig. 2C). Furthermore, in bone marrow-derived macrophages (BMDMs)  
215 isolated from RNF213 knockout mice <sup>59</sup> we found that the number and size of lipid droplets was similar to  
216 WT BMDMs (Supplementary Fig. 5B-C), indicating that in macrophages RNF213 is not essential for lipid  
217 droplet stability, in contrast to other cell types <sup>57</sup>. Together, these data show that RNF213 binds ISGylated  
218 proteins and that RNF213 recruits ISGylated proteins to LDs.

219

220

## 221 **IFN-I induces RNF213 ISGylation and oligomerization on lipid droplets**

222 We subsequently investigated how oligomerization of RNF213 on LDs is regulated. Since both ISG15 and  
223 RNF213 are IFN-I induced genes (Supplementary Fig. 6A)<sup>60</sup>, it seemed plausible that multimerization of  
224 RNF213 into a sensing platform for ISGylated proteins could be mediated by interferon signaling. We  
225 therefore evaluated the effect of IFN-I on the distribution of endogenous RNF213 between the soluble and  
226 membrane-associated fractions in HeLa cells and found that the level of membrane-associated RNF213  
227 slightly increased upon IFN-I treatment (Supplementary Fig. 6B). To further confirm RNF213  
228 oligomerization in a relevant model, we separated lysates from control and IFN-I treated THP-1 cells by  
229 sedimentation over continuous glycerol gradients. Western blotting of the collected fractions clearly  
230 showed that IFN-I treatment gave rise to a pool of higher molecular weight RNF213 in fractions 14 to 20,  
231 as expected after oligomerization (Fig. 3A). Interestingly, this pool of slow migrating RNF213 was marked  
232 by the presence of higher molecular weight bands on the blots, most likely representing modified forms of  
233 RNF213. Since we recently identified RNF213 as the most ISGylated protein with twenty-two ISGylation  
234 sites in the liver of bacterially infected mice<sup>61</sup>, we tested whether oligomeric RNF213 was ISGylated.  
235 Immunoprecipitating RNF213 from each fraction followed by immunoblotting for ISG15 showed that this  
236 was indeed the case, while a ubiquitin-specific signal was only detected in the low-density fractions (Fig.  
237 3A). The ISG15 blot revealed two major groups of ISGylated RNF213 with one group of bands running at  
238 virtually the same height as monomeric RNF213 and a second, hyper-ISGylated group of bands running  
239 well above (Fig. 3A). Knockdown of Ube1L, the E1 activating enzyme for ISG15, strongly reduced the  
240 intensity of both groups of ISGylated RNF213 while it increased the intensity of monomeric RNF213,  
241 indicating that ISGylation of RNF213 is required for its oligomerization (Fig. 3B and Supplementary Fig.  
242 6C). Finally, we repeated the glycerol sedimentation experiment after LD isolation and showed that the  
243 oligomeric, ISGylated forms of RNF213 are associated with LDs only after IFN-I treatment (Fig. 3C).  
244 Together, these results show that IFN-I induces the oligomerization of RNF213 on LDs and that this process  
245 requires ISG15 modification of RNF213 itself.

## 246 **RNF213 exerts broad antimicrobial activity *in vitro***

247 The discovery of RNF213 as a sensor for ISGylated proteins made us hypothesize that RNF213 could also  
248 have antiviral properties, similar to ISG15. To investigate this, we infected cells with reduced or enhanced  
249 expression levels of RNF213 with different viral pathogens. We first infected HeLa cells with herpes  
250 simplex virus 1 (HSV-1), a widespread human pathogen that can cause cold sores and genital herpes that  
251 is ISG15-sensitive<sup>62</sup>. We used a GFP-expressing HSV-1 strain to monitor infection levels up to three days  
252 post infection by fluorescence intensity. Knockdown of RNF213 led to significantly higher infection levels  
253 compared to scrambled siRNA control, both in the presence or absence of IFN-I (Fig. 4A-C). Conversely,  
254 overexpression of FLAG-RNF213 significantly lowered HSV-1 infection levels, although not to the same  
255 extent as overexpressed MXB, which was recently reported as a Herpesvirus restriction factor (Fig. 4D-E)

256 <sup>63</sup>. We also determined the possible involvement of RNF213 in the control of replication of human  
257 respiratory syncytial virus (RSV), an important human respiratory pathogen that is susceptible to an ISG15-  
258 dependent antiviral effect <sup>10</sup>. For these experiments, A549 cells were infected with RSV-A2 at a low  
259 multiplicity of infection and incubated for six days to allow multiple rounds of infection (Supplementary  
260 Fig. 7A). Knockdown of RNF213 significantly increased the viral load in the cell culture supernatants five  
261 days post-infection compared to scrambled siRNA control, an effect that disappeared at day six (Fig. 4F).  
262 In addition, when the cells were treated with IFN-I, significantly higher viral loads were observed in  
263 siRNF213-treated cells compared to siScramble-treated cells at day five and six after infection (Fig. 4G).  
264 We also assessed the effect of RNF213 knock down on RSV replication in a plaque assay because the  
265 plaque size is a measure for the extent of cell-to-cell spread of the virus. On day six after RSV infection,  
266 we observed significantly larger plaques upon knockdown of RNF213 both with and without IFN-I,  
267 suggesting also increased cell-to-cell spread of RSV under these conditions (Fig. 4H-I). As a third ISG15-  
268 sensitive viral pathogen we tested CVB3, a Picornavirus that can lead to cardiomyopathy and that is known  
269 to be ISG15-sensitive <sup>11,12</sup> (Supplementary Fig. 7B). Again, knockdown of RNF213 significantly increased  
270 the replication of CVB3 as indicated by higher viral genome (Fig. 4J) and enhanced viral protein expression  
271 levels (Fig. 4K) as well as by the elevated formation of infectious viral particles from cells (Fig. 4L).

272 We subsequently wondered whether RNF213 could be broadly antimicrobial and also target bacterial  
273 pathogens. Thus, we infected HeLa cells with *Listeria monocytogenes*, a facultative intracellular bacterium  
274 that was recently reported to be counteracted by ISG15 <sup>6</sup> (Supplementary Fig. 7C). When we knocked down  
275 RNF213 with a pool of siRNAs, we measured a 30% increase in intracellular bacteria compared to a pool  
276 of control siRNA, an increase that was similar to what we observed by knockdown of ISG15 (Fig. 5A).  
277 Individual siRNAs against RNF213 also augmented the bacterial load (Supplementary Fig. 7D).  
278 Concordantly, overexpression of FLAG-RNF213 reduced the bacterial load with 85% relative to mock  
279 transfected cells, a reduction that was similar to overexpression of HA-ISG15 (Fig. 5B). Importantly, the  
280 protective effect of overexpressed FLAG-RNF213 was lost in ISG15 knockout cells (Fig. 5C), indicating  
281 that the antimicrobial activity of RNF213 requires ISG15. In contrast, overexpressed HA-ISG15 still  
282 counteracted *Listeria* in RNF213 knockout (Fig. 5D) or knockdown cells (Supplementary Fig. 7E), meaning  
283 that ISG15 also harbors antimicrobial activity independent of RNF213. Taken together, we showed that  
284 increasing the expression levels of RNF213 led to lower infection levels of HSV-1 and *L. monocytogenes*  
285 in cultured cells, while reducing the levels of RNF213 promoted *in vitro* infection with HSV-1, RSV, CVB3  
286 and *L. monocytogenes*. These results show that RNF213 plays an important role in the innate cellular  
287 immune response, indicating a functional link between ISG15 and RNF213.

288

289



290 **RNF213 decorates intracellular *Listeria monocytogenes* and is profoundly antibacterial *in vivo***

291 Given the protective function of RNF213 against *Listeria*, we wondered if RNF213 adopts a specific  
292 subcellular localization during infection. To this end, we transfected HeLa cells with eGFP-RNF213. Co-  
293 staining for LDs followed by fluorescence microscopy revealed that RNF213 co-localized with the majority  
294 (~70%) of LDs, both in uninfected and *Listeria*-infected cells (Fig. 6A-B). Intriguingly, in the latter  
295 condition RNF213 also co-localized with a subset of intracellular *L. monocytogenes*, decorating the  
296 bacterial surface. To quantify this phenomenon we repeated the experiment with mCherry-expressing  
297 *Listeria* and found that on average approximately 40% of intracellular *Listeria* co-localized with RNF213  
298 (Fig. 6C-D). Thus, our data show that during infection with *L. monocytogenes*, in addition to LDs, RNF213  
299 localizes to a subset of intracellular bacteria.

300 In order to test whether this localization has functional consequences *in vivo*, we deleted RNF213 in mice  
301 using CRISPR/Cas9 targeting of mouse *RNF213* exon 28 as previously described<sup>59</sup> (Supplementary Fig.  
302 8A). At 24, 48 and 72 hours post infection with *L. monocytogenes* we observed a dramatic increase in  
303 bacterial burden in the spleen of *rnf213*<sup>-/-</sup> animals compared to WT littermate controls which increased over  
304 time (Fig. 7A). At 72 hours, a significant increase was also detected in the liver (Fig. 7B) and this  
305 observation was confirmed in two additional independent experiments (Supplementary Fig. 8B-E). This  
306 profound difference in bacterial load, particularly in the spleen, reveals the central importance of RNF213  
307 in immune cell function and intracellular bacterial clearance. Future work will assess which cell type is  
308 unable to control infection and whether RNF213 deletion also affects adaptive next to innate responses.  
309 This is of particular relevance to understanding the role of inflammation or prior infection in human patients  
310 with inborne errors in RNF213.

311 **The RNF213 E3 module is required for its antimicrobial activity**

312 While the present study was under review, Ahel et al. published the structure of monomeric RNF213<sup>64</sup>  
313 showing that RNF213 does not depend on its RING domain to function as an E3 ubiquitin ligase, but instead  
314 classifies as a new type of E3 ligase employing a Cys-containing motif to promote ubiquitin transfer via  
315 transthiolation. While the active site cysteine residue remains to be determined and a  $\Delta$ RING mutant still  
316 exhibits ubiquitination activity<sup>64</sup>, we sought to use this newly available structural data to test whether the  
317 E3 ligase activity of RNF213 is required for its antimicrobial function. We therefore deleted the C-terminal  
318 1210 amino acids of RNF213 comprising the large E3 module and small C-terminal domain to generate a  
319 FLAG-RNF213 $\Delta$ C construct that should be devoid of any ubiquitination activity. GST pull down showed  
320 that RNF213 $\Delta$ C was still capable of binding ISG15, while the complementary C-terminal fragment was not  
321 (Fig. 8A). Similarly, FLAG-RNF213 $\Delta$ C was capable of pulling down a smear of ISGylated proteins to the  
322 same extent as full length FLAG-RNF213 (Fig. 8B). However, interestingly overexpression of RNF213 $\Delta$ C  
323 no longer retained its notable antimicrobial effects when overexpressed as it could not reduce the amount

324 of intracellular *Listeria* in infected HeLa cells (Fig. 8C). Furthermore, fluorescence microscopy confirmed  
325 that eGFP-RNF213 $\Delta$ C did no longer co-localize with intracellular *Listeria* (Fig. 8D) nor with LDs  
326 (Supplementary Fig. 9A-B). Taken together, these results indicate that the E3 module of RNF213, and  
327 likely its ubiquitination activity, is required for its bacterial targeting and antimicrobial activity.

## 328 **DISCUSSION**

329 We report the discovery of RNF213 as an intracellular sensor for proteins modified by ISG15, a ubiquitin-  
330 like, immunity-related modification. We show that IFN-I signaling induces the oligomerization and  
331 translocation of RNF213 on lipid droplets in macrophages and that this process requires ISGylation of  
332 RNF213 itself. Furthermore, *in vitro* and *in vivo* infection assays with four different pathogens revealed an  
333 as yet undescribed, broad antimicrobial function of RNF213. Thus, our unique Virotrap method revealed a  
334 novel functional link between ISG15 and RNF213, as well as an undiscovered role for RNF213 in host  
335 defense pathways to both bacterial and viral infections.

336 We identified RNF213 as an ISG15-binding protein by Virotrap and confirmed the interaction by GST pull  
337 down assays, methods that both create a curved surface, either convex or concave, studded with ISG15  
338 molecules which could be a surrogate for multiply modified proteins or larger binding surfaces such as  
339 organelles. It was of particular interest, that we identified a large AAA+ ATPase as ISG15 interactors under  
340 these conditions, RNF213, which presumably docks on ISG15 surfaces or vice versa. Indeed, our data  
341 suggests that oligomeric RNF213 acts as a binding platform for ISGylated proteins on the surface of lipid  
342 droplets. In line with this, we demonstrated that ISGylated proteins co-immunoprecipitated with RNF213  
343 and that fewer ISGylated proteins were isolated on lipid droplets without RNF213. It remains unknown  
344 what happens to ISGylated proteins after binding to RNF213. As a model, we were inspired by similarities  
345 between the interaction of poly-SUMOylated substrate proteins with RNF4, a SUMO-targeted ubiquitin  
346 ligase (STUbL)<sup>51</sup> that could be an analogous system to RNF213 and ISGylation. In the STUbL pathway,  
347 nuclear stresses lead to poly-SUMOylation of protein targets that are further recognized by RNF4. RNF4  
348 then ubiquitinates the poly-SUMOylated proteins, targeting them for degradation by the proteasome. Our  
349 model is that RNF213 might recognize multi-ISGylated proteins as the entry point of a novel pathway for  
350 further processing of multi-ISGylated proteins at lipid droplets. While RNF4 & poly-SUMOylation are  
351 both induced by nuclear stress, RNF213 and multi-ISGylation are induced by IFN-I signaling<sup>60,65</sup>.  
352 Moreover, co-regulation of ISG15 and RNF213 was previously observed in a large-scale analysis of protein  
353 quantitative trait loci (pQTL)<sup>66</sup>, also suggesting that both proteins operate in the same cellular pathway.  
354 Our future work will address the fate of ISGylated proteins that bind RNF213. It is particularly intriguing  
355 to determine if the E3 module of RNF213 ubiquitinates the bound ISGylated proteins for proteasomal  
356 degradation, which could be substantiated by the identification of VCP and proteasome components



357 alongside RNF213 in the ISG15 Virotrap experiments. Alternatively, the ISGylated proteins bound to  
358 RNF213 might be degraded via lipophagy<sup>67</sup> or targeted for an alternative fate.

359 RNF213 is a very large, poorly characterized human protein. Recent functional studies highlighted the role  
360 of RNF213 in lipid metabolism, mediating lipid droplet formation<sup>57</sup> and lipotoxicity<sup>68</sup>. The latter study  
361 also assessed RNF213-dependent ubiquitinome changes and showed that RNF213 was required to activate  
362 the nuclear factor  $\kappa$ B (NF $\kappa$ B) pathway upon palmitate treatment. This NF $\kappa$ B-inducing function of RNF213  
363 would, however, be negatively regulated by its ubiquitin ligase activity<sup>69</sup> and requires further investigation,  
364 especially in light of the RNF213 antimicrobial activity reported here. The newly published cryo-EM  
365 structure of monomer RNF213 revealed three major structural components comprising an N-terminal stalk,  
366 a dynein-like ATPase core and a C-terminal E3 module<sup>64</sup>. Previous studies showed that the ATPase activity  
367 of RNF213 is essential for its multimerization and localization to lipid droplets, however, in contrast to  
368 most AAA+ ATPases that form stable hexamers<sup>55</sup>, multimerization of RNF213 is proposed to be a dynamic  
369 process, similar to the dynamic assembly of the microtubule-severing protein katanin<sup>55,57</sup>. In this model  
370 RNF213 exists as a monomer in solution and forms a hexamer on the surface of lipid droplets upon ATP  
371 binding<sup>57</sup>. Contrary to this, the RNF213 structure demonstrated the presence of six AAA units within the  
372 monomeric molecule<sup>64</sup>, putting into question the mechanism of oligomerization and proposed hexameric  
373 nature of oligomer RNF213. We here report that oligomerization of RNF213 on lipid droplets is induced  
374 by IFN-I and requires ISGylation of RNF213 itself, an observation that fits with our previous identification  
375 of RNF213 as the most ISGylated protein in liver of *Listeria*-infected mice<sup>61</sup>. Various inducers of RNF213  
376 ISGylation could thus potentially facilitate future structural studies on oligomeric RNF213. However, the  
377 mechanism of IFN-I induced oligomerization of RNF213 remains an open question. Relevant in this regard  
378 is that RNF213 was reported as a substrate of Protein tyrosine phosphatase 1B (PTP1B or PTPN1),  
379 controlling non-mitochondrial oxygen consumption in response to hypoxia<sup>70</sup>. Since PTP1B also affects  
380 JAK-STAT signaling<sup>71,72</sup>, it would be worthwhile testing whether PTPB1 also regulates RNF213  
381 oligomerization in response to interferon.

382 It is likely that further processing of ISGylated proteins bound to RNF213 is closely linked to the emerging  
383 function of LDs beyond passive lipid storage and lipid homeostasis. LDs have a role in the coordination of  
384 immune responses as they participate in the production of pro-inflammatory mediators<sup>73</sup>. LDs have been  
385 associated with the IFN-I response and antigen cross presentation<sup>74</sup>. Moreover, an increasing number of  
386 studies show that viral and bacterial pathogens target LDs during infection either for nutritional purposes  
387 or as part of an anti-immunity strategy<sup>73</sup>. Recent work showed that host cells exploit LD targeting by  
388 pathogens by loading LDs with antimicrobial proteins as an intracellular first line of defense<sup>75</sup>. In this  
389 study, RNF213 was found to be enriched on LDs isolated from the liver of LPS-treated mice, similar to our  
390 results on IFN-treated cells. This is particularly interesting since ISGylation is also induced by LPS<sup>7</sup> The

391 localization of RNF213 on the surface of LDs could represent a host-cell strategy for fighting intracellular  
392 pathogens that hijack LDs. Given that LDs are also sites of viral assembly, RNF213 could interrupt this  
393 process to decrease infectivity in the cell. The broad antimicrobial activity of RNF213 that we observed  
394 bolsters this hypothesis.

395 The localization of RNF213 as a general virus restriction factor on the surface of LDs could be further  
396 rationalized in the context of enteroviruses, such as coxsackievirus, which replicate at specialized  
397 membranous domains named replication organelles <sup>76</sup>. However, whether RNF213 also resides in such  
398 lipid-rich replication organelles remains to be determined. On the other hand, ISG15 contributes to the IFN-  
399 dependent anti-RSV effect, whereas no role for RNF213 has been reported in the control of RSV. In this  
400 context, it is important to note that RSV encodes two prominent non-structural proteins that profoundly  
401 suppress type I IFN induction and signaling <sup>77</sup>. The latter is also true for HSV-1, which has evolved multiple  
402 strategies to evade the host antiviral response and to establish latent infections, so far without any known  
403 involvement of RNF213 <sup>78</sup>. With all three tested viral pathogens we observed a clear, but subtle antiviral  
404 effect of RNF213. Knockdown or overexpression of RNF213 changed viral infection levels two to five  
405 fold, in contrast to *Listeria* where we observed up to 100,000 fold differences in bacterial load, especially  
406 *in vivo*, indicating a more pronounced antibacterial effect.

407 Genome-wide siRNA screens in *Listeria*-infected HeLa cells previously ranked RNF213 as a protective  
408 host protein *in vitro*, in line with our observations <sup>79</sup>. Importantly, the protective effect of RNF213 was lost  
409 in ISG15 KO cells, indicating that the antimicrobial activity of RNF213 requires ISG15. Inversely, ISG15  
410 was still functional in RNF213 deficient cells, pointing towards other unknown conjugation-dependent or  
411 -independent mechanisms by which ISG15 counteracts *Listeria*, as shown for many other pathogens (Perng  
412 and Lenschow, 2018). Our infection experiments with *Listeria* in mice which lack RNF213 corroborated  
413 the protective effect *in vivo*, showing a multi-log increase in the number of colony-forming units in liver  
414 and spleen over time compared to WT animals. This increase is larger than what was reported under the  
415 same conditions for ISG15-deficient animals <sup>6</sup> and is reminiscent of *Listeria* infections in mice deficient in  
416 key immune signaling pathways necessary to control primary infection such as IFN-gamma <sup>80,81</sup>. Further  
417 characterization of the immune response in the RNF213-deficient animals is both timely and relevant to  
418 assess whether a defect in cell autonomous immunity is underlying the increased susceptibility, as suggested  
419 by our *in vitro* data.

420 Co-localization of RNF213 with intracellular *Listeria* further supports a function of RNF213 as a restrictive  
421 host factor. Co-localization of proteins with intracellular bacteria is described as an antibacterial strategy  
422 known as xenophagy. Upon activation, specific E3 ubiquitin ligases, such as LRSAM1, SMURF1 or Parkin  
423 decorate invading pathogens with ubiquitin chains. Cytosolic adaptor proteins such as NBR1 or p62  
424 recognize K48 or K63 ubiquitin chains and recruit LC3-II to capture the ubiquitinated bacteria into

425 expanding autophagosomes<sup>82</sup>. Since RNF213 has an active E3 ubiquitin ligase module, it is tempting to  
426 speculate that RNF213 conjugates ubiquitin chains to invading *Listeria* and facilitates its capture into  
427 autophagosomes. However, it remains to be determined if RNF213 is directly recruited to the surface of  
428 *Listeria* or rather to surrounding structures such as autophagic membranes on which the protein could  
429 oligomerize similar to what occurs on lipid droplets. Interestingly, wild-type bacteria evade xenophagy  
430 through cell-to-cell spread<sup>83</sup>, thus RNF213 colocalization may be a related but distinct antimicrobial  
431 pathway that wild-type bacteria cannot evade. Alternatively, loss of bacterial and LD co-localization of the  
432 RNF213 $\Delta$ C mutant could be analogous to what was shown for variants lacking of a functional ATPase  
433 core, i.e. that ubiquitination activity seems to be required for oligomerization and organelle targeting of  
434 RNF213<sup>57</sup>. Taken together, the data presented here provides the first evidence for co-localization of  
435 RNF213 with intracellular bacteria, classifying RNF213 as a new pathogen-directed E3 ubiquitin ligase.

436 Finally and most notably, the largest amount of information regarding RNF213 relates to MMD  
437 characterized by progressive stenosis of the internal carotid arteries and the secondary formation of a hazy  
438 network of basal collateral vessels in the brain<sup>84,85</sup>. Allelic variations in the *RNF213* gene are the most  
439 important genetic risk factor to develop MMD, however, the functional role of RNF213 in MMD  
440 pathogenesis remains elusive<sup>86</sup>. The best-characterized risk allele is the Asian-specific *RNF213* founder  
441 variant (p.R4810K) which dramatically increases the risk to develop MMD (e.g. >100-fold in Japan) and  
442 likely explains the higher MMD incidence in East-Asia. However, p.R4810K displays a strongly reduced  
443 penetrance since the incidence rate of MMD (e.g. 1/10,000 in the Japanese population) is much lower than  
444 the population p.R4810K carrier frequency (e.g. 1/50 Japanese carry the RNF213 R4810K risk allele)<sup>86</sup>.  
445 This strongly suggests that additional genetic and/or environmental stimuli are required to induce MMD  
446 pathogenesis. Our study highlights that RNF213 plays a fundamental role as an antimicrobial host defense  
447 effector which could be inappropriately triggered during autoimmune responses, prior infection and/or  
448 inflammation in MMD patients<sup>87</sup>. Indeed, previous work suggests that RNF213, like ISG15, is induced by  
449 IFN-I and pro-inflammatory cytokines<sup>88</sup>. Here, we show that RNF213 oligomerization could depend on  
450 ISGylation of RNF213 and that the protein protects against infection with various pathogens. These data  
451 strongly support a role for infectious diseases as trigger to induce MMD in patients carrying RNF213  
452 polymorphisms. It is conceivable that those patients have an impaired immune response to infection that  
453 could drive vascular fragility and increased vulnerability of vessels to hemodynamic stress and secondary  
454 insults. Together, the data presented here argues for a role of the immune response to infection in the  
455 development of MMD and should be fully explored in future studies of the etiology of this mysterious  
456 disease.

457

458 **ACKNOWLEDGEMENTS**

459 We are grateful to Prof. Akio Koizumi for providing a 3xFLAG-RNF213 expression plasmid, to Prof.  
460 Pascale Cossart for sharing the *Listeria monocytogenes* EGD strain and *Listeria* EF-TU antisera, to Prof.  
461 Dr. Stacey Efstathiou for providing a GFP expressing HSV-1 strain and to Prof. Dr. Gary Cohen for  
462 providing the HSV-1 VP5 antisera. We thank Evelyn Plets and Annelies Van Hecke for help with the  
463 genotyping and *in vitro* infection experiments. A.B., K.P.K., and F.I. are supported by ERANET Infect-  
464 ERA BacVIRISG15. The German Research Foundation funded this project with grant KN590/7-1 to KPK,  
465 BE6335/6-1 to AB, CRC/TR167, project B16 to KPK and AB as well as CRC 1292, project 02 to AB. AB  
466 receives support from the Foundation for Experimental Biomedicine Zurich, Switzerland. CB is supported  
467 by International Max Planck Research School for Infectious Diseases and Immunology (IMPRS-IDI),  
468 Berlin. F.I. is supported by an Odysseus type 2 grant from the Research Foundation Flanders (G0F8616N).  
469 B.D. is supported by an Odysseus type 1 Grant of the Research Foundation Flanders (3G0H8318) and a  
470 starting grant from Ghent University Special Research Fund (01N10319). This work was supported by an  
471 NIH grant 1R35GM137961 to LR. XS acknowledges support from the FWO EOS project VIREOS and a  
472 BOF-UGent GOA project. N.C. is supported by the European Research Council (ERC) Consolidator Grant  
473 GlycoTarget (616966) and S.S. is supported by Research Grants Council, Hong Kong (17113019) and  
474 Wellcome Trust (220776/Z/20/Z).

475 **Figure 1. Identification of RNF213 as ISG15-binding protein**

476 **(A)** Workflow showing the strategy for mapping ISG15 interaction partners. Virotrap and GST pulldown  
477 were employed as two orthogonal methods. In Virotrap, GAG-ISG15 was transiently expressed in  
478 HEK293T cells. 24 h post-transfection, cells were either treated with 10 ng/mL interferon- $\alpha$  for 24 h or left  
479 untreated. Budding virus-like particles (VLPs) containing ISG15 and its interaction partners were purified,  
480 lysed and digested into peptides prior LC-MS/MS analysis. In the GST pull down, glutathione beads were  
481 decorated with GST-ISG15 and mixed with a cellular lysate from HEK293T, HeLa, or THP-1 cells. Prior  
482 to lysis cells were treated for 24 h with 10 ng/mL interferon- $\alpha$  (HEK293T) or interferon- $\beta$  (HeLa and THP-  
483 1). Following on-bead digestion, the resulting peptides were analyzed by LC-MS/MS. **(B)** Volcano plot  
484 showing the result of a t-test to compare VLPs containing mature ISG15 versus VLPs containing  
485 dihydrofolate reductase from *Escherichia coli* (eDHFR) as negative control (n=4 replicates). The fold  
486 change (in log<sub>2</sub>) of each protein is shown on the x-axis, while the statistical significance (-log P-value) is  
487 shown on the y-axis. Proteins outside the curved lines represent specific ISG15 interaction partners.  
488 Proteins identified as ISG15 interaction partners in all virotrap screens, are annotated (n=29) and listed in  
489 Table S1. **(C)** VLPs containing ISG15 or eDHFR were collected and analyzed by immunoblot against  
490 RNF213, ISG15 and GAG. FLAG-RNF213 purified from a lysate of HEK293T cells was loaded as a  
491 positive control and confirmed the presence of an RNF213 band in the ISG15 VLPs. **(D-F)** Volcano plots  
492 comparing GST pull downs using GST-ISG15-coated beads with GST-coated beads as control in lysates  
493 of HEK293T, THP-1 and HeLa cells (n=3). Proteins significantly enriched in pull downs with ISG15-  
494 coated beads are annotated. **(G)** GST pull downs with ISG15, ubiquitin and SUMO followed by  
495 immunoblotting show binding of RNF213 to ISG15, but not to ubiquitin or SUMO. Beads coated with each  
496 UBL were mixed with a lysate of HEK293T cells expressing FLAG-RNF213 and bound proteins were  
497 analyzed by immunoblot against FLAG and GST. **(H-I)** Validation of GST pull down assays with ubiquitin  
498 and SUMO using RNF31 and RNF4 as known binders of these UBLs, respectively. Assays were performed  
499 as in **(G)**.

500 **Figure 2. RNF213 binds ISGylated proteins on lipid droplets**

501 **(A)** FLAG immunoprecipitation was performed from lysates of HEK293T cells expressing FLAG-RNF213  
502 or FLAG-eGFP in combination with HA-ISG15(AA) and the ISGylation machinery (E1, E2, E3). A smear  
503 of ISGylated co-immunoprecipitated proteins was detected with FLAG-RNF213, but not with FLAG-eGFP  
504 or when non-conjugatable HA-ISG15AA was used. **(B)**. THP-1 or primary human monocytes (CD14+)  
505 cells were cultured in the presence of 10 mM BSA-conjugated oleic acid and either treated with 10 ng/mL  
506 interferon- $\beta$  for 8 h or left untreated. Lipid droplets (LDs)-enriched fractions were isolated by  
507 ultracentrifugation floatation assay on a sucrose step-gradient. Immunoblots against RNF213 and ISG15  
508 revealed an interferon-induced upregulation of both proteins on LDs and a smear of ISGylated proteins  
509 associated with LDs. Immunoblots against PLIN1, PLIN2, ATGL and GAPDH confirmed LD isolation and

510 equal protein loading in the lysate and LD-enriched fraction (1/20<sup>th</sup> of the lysate and all of the LD-enriched  
511 material was loaded). (C) Similarly, LDs were isolated from THP1 cells after knockdown of RNF213 by  
512 siRNA treatment for 48h or using a non-targeting scrambled siRNA (siScramble) as control.  
513 Immunoblotting against ISG15 revealed a smear of ISGylated proteins associated with LDs only when  
514 RNF213 was present. Immunoblotting against RNF213 confirmed knockdown of RNF213, while PLIN1,  
515 PLIN2, ATGL and GAPDH validated LD isolation and equal protein loading in the lysate and the LD-  
516 enriched fraction (1/20<sup>th</sup> of the lysate and all of the LD-enriched material was loaded).

517 **Figure 3. Type-I interferon induces RNF213 ISGylation and oligomerization on lipid droplets**

518 (A) THP-1 cells were treated with 10 ng/mL interferon- $\beta$  for 8 h or left untreated. Lysates were separated  
519 by density gradient ultracentrifugation on glycerol gradients (10 – 40% (v/v), Svedberg constants of the  
520 standard markers are indicated above the blots) to isolate the monomeric versus oligomeric form of  
521 RNF213. Twenty fractions for each sample were collected, concentrated by TCA precipitation and analyzed  
522 by immunoblotting against RNF213, showing the presence of oligomer RNF213 in fraction 14 to 20 upon  
523 interferon treatment (upper panel). Alternatively, RNF213 was immunoprecipitated (IP) from each fraction,  
524 first desalted over Amicon columns. Immunoprecipitated material was eluted into loading buffer and  
525 analyzed by immunoblotting against ISG15 and ubiquitin, showing (hyper)ISGylation of oligomer RNF213  
526 upon interferon treatment (lower panel). (B) The monomeric and oligomeric forms of RNF213 were  
527 separated by density gradient ultracentrifugation after interferon- $\beta$  treatment as in (A) and knockdown of  
528 Ube1L by siRNA treatment for 48 h, using a non-targeting scrambled siRNA (NT) as control. Knockdown  
529 of Ube1L strongly reduced RNF213 oligomerization upon interferon treatment. (C) LDs were isolated by  
530 ultracentrifugation floatation assay on a sucrose step-gradient and associated proteins were further  
531 separated by density gradient ultracentrifugation to isolate the monomeric and oligomeric form of RNF213  
532 after interferon- $\beta$  treatment as in (A). Fractions were concentrated by TCA precipitation and analyzed by  
533 immunoblotting against RNF213, showing association of oligomeric RNF213 with LDs upon interferon  
534 treatment.

535 **Figure 4. RNF213 counteracts herpes simplex, respiratory syncytial and coxsackie virus infection**

536 (A) HeLa cells were infected up to 72 h with eGFP-expressing recombinant herpes simplex virus 1 (HSV-  
537 1) at MOI 0.1. 72 h prior to infection, cells were transfected with a pool of siRNAs targeting RNF213  
538 (siRNF213) or a pool of scrambled siRNAs (siScramble) as control. The viral load was determined by  
539 monitoring the GFP signal in each condition every 24 h to generate a viral growth curve (right panel,  
540 representative viral growth curve, AVG  $\pm$  SEM, n=4 replicates, two-tailed unpaired t-test comparing  
541 siRNF213 to siScramble, \* p < 0.05, \*\* p < 0.01 and \*\*\*\* p < 0.0001). The area under the curve (AUC)  
542 was calculated for each growth curve and the average AUC of three independent experiments is shown  
543 relative to the siScramble control (left panel, AVG  $\pm$  SEM, n=3 independent experiments, two-tailed



544 unpaired t-test, \*  $p < 0.05$  and \*\*  $p < 0.01$ ). **(B)** HSV-1 infection experiment performed as in (A), except  
545 that 16 h prior to infection cells were treated with 1,000 U/mL interferon- $\alpha$ . Knockdown of RNF213 leads  
546 to significantly higher HSV-1 infection levels, both in the absence (A) and presence of interferon- $\alpha$  (B).  
547 **(C)** Immunoblots against RNF213, HSV-VP5 and MXA with tubulin as loading control confirmed  
548 knockdown of RNF213, HSV-1 infection and interferon- $\alpha$  treatment, respectively, in the experiments  
549 shown in (A-B). **(D)** HSV-1 infection experiment performed as in (A-B), except that 24 h prior to infection  
550 cells were transfected with plasmids encoding 3X-FLAG-RNF213 or MXB or with an empty vector (mock)  
551 as control (right panel, representative viral growth curve,  $AVG \pm SEM$ ,  $n=4$  replicates, two-tailed unpaired  
552 t-test comparing siRNF213 to siScramble, \*  $p < 0.05$ , \*\*  $p < 0.01$  and \*\*\*\*  $p < 0.0001$ ). The average AUC  
553 of two independent experiments is shown relative to the mock control (left panel,  $AVG \pm SEM$ ,  $n=2$   
554 independent experiments, two-tailed unpaired t-test, \*  $p < 0.05$  and \*\*  $p < 0.01$ ). Overexpression of RNF213  
555 leads to significantly lower HSV-1 infection levels, as also observed for MXB as positive control. **(E)**  
556 Immunoblots against FLAG, HSV-VP5 and MXB with tubulin as loading control confirmed HSV-1  
557 infection and expression of FLAG-RNF213 and MXB in the experiments shown in (D). **(F)** A549 cells  
558 were infected with RSV-A2 for up to six days at MOI 0.02. 48 h prior to infection, cells were transfected  
559 with a pool of siRNAs targeting RNF213 (siRNF213), a single siRNA targeting the RSV-nucleoprotein  
560 (RSV-N) as positive control or a pool of scrambled siRNAs (siScramble) as negative control. The viral titer  
561 was determined by counting plaque-forming units (PFUs) after serial dilution ( $AVG \pm SEM$ ,  $n=3$  replicates,  
562 two-tailed unpaired t-test compared siRNF213 to siScramble, \*\*  $p < 0.01$ , and \*\*\*\*  $p < 0.0001$ ). **(G)** RSV  
563 infection experiment performed as in (F), except that 42 h prior to infection cells were treated with 10  
564 ng/mL interferon- $\beta$ . Knockdown of RNF213 leads to significantly higher RSV titers, both in the absence  
565 (F) and presence of interferon- $\beta$  (G). **(H)** A549 cells were infected with RSV-A2 at MOI 0.005 in  
566 combination with knockdown of RNF213 and RSV-N as described in (F). Six days post infection, a plaque  
567 assay was performed and plaque sizes were quantified in pixels with Fiji (left panel,  $AVG \pm SEM$ , Mann-  
568 Whitney test, \*  $p < 0.05$ , \*\*  $p < 0.01$  and \*\*\*  $p < 0.001$ , siRSV-N  $n=8$ , siScramble  $n=267$  and siRNF213  
569  $n=183$ ). Representative images showing plaques of the siRNF213 and siScramble treated cells are shown  
570 in the right panel. **(I)** RSV infection experiment performed as in (H), except that 42 h prior to infection cells  
571 were treated with 10 ng/mL interferon- $\beta$  (left panel, siRSV-N  $n=4$ , siScramble  $n=123$  and siRNF213  $n=99$ ).  
572 Knockdown of RNF213 leads to significantly larger RSV plaques, both in the absence (H) and presence of  
573 interferon- $\beta$  (I). **(J)** HeLa cells were infected with coxsackievirus B3 (CVB3) at MOI 0.01. 24 h prior to  
574 infection, cells were transfected with a pool of siRNAs targeting RNF213 (siRNF213) or a pool of  
575 scrambled siRNAs (siScramble) as control. 24h post infection, the intracellular viral RNA load was  
576 determined by qRT-PCR ( $AVG \pm SEM$ ,  $n=3$  independent experiments, two-tailed unpaired t-test, \*  $p <$   
577  $0.05$ ). **(K)** From the same experiment as in (J), the intracellular viral protein load was determined by  
578 immunoblotting against VP1 and the intensity of the VP1 band is shown relative to the siScramble control



579 (left panel, AVG  $\pm$  SEM, n=4 independent experiments, one-tailed t-test, \*  $p < 0.05$ ). A representative  
580 immunoblot for the quantification of VP1 is shown in the right panel. **(L)** From the same experiment as in  
581 (J), the viral titer was determined by counting PFUs after serial dilution (AVG  $\pm$  SEM, n=3 replicates, two-  
582 tailed unpaired t-test, \*\*  $p < 0.01$ ). Knockdown of RNF213 leads to a significant increase in CVB3 infection  
583 as measured by higher viral genome (J), protein (K) and titer (L).

#### 584 **Figure 5. RNF213 counteracts *Listeria* infection**

585 **(A)** HeLa cells were infected with *Listeria monocytogenes* EGD for 16 h at a multiplicity of infection (MOI)  
586 of 25. 24 h prior to infection, cells were transfected with a pool of siRNAs targeting ISG15 (siISG15),  
587 RNF213 (siRNF213) or a pool of scrambled siRNAs as control. Intracellular *Listeria* were quantified after  
588 serial dilution by counting colony-forming units (CFUs) in a gentamycin assay. The percentage of  
589 intracellular bacteria relative to siScramble-transfected cells is shown (AVG  $\pm$  SEM, n=3 independent  
590 experiments, two-tailed unpaired t-test, \*\*  $p < 0.01$ , \*\*\*\*  $p < 0.0001$ ) (left panel). Immunoblots against  
591 RNF213 and ISG15 with tubulin as loading control confirmed knockdown of both proteins (right panel).  
592 **(B)** HeLa cells were infected with *Listeria* for 4 h at MOI 25. 24 h prior to infection, HeLa cells were  
593 transfected with plasmids encoding 3xFLAG-RNF213 or HA-ISG15 or with an empty vector (mock) as  
594 control. Intracellular *Listeria* were quantified as in (A) and the percentage of intracellular bacteria relative  
595 to mock plasmid-transfected cells is shown (AVG  $\pm$  SEM, n=3 independent experiments, two-tailed  
596 unpaired t-test, \*\*\*  $p < 0.001$ ) (left panel). Immunoblots against FLAG and HA with tubulin as loading  
597 control confirmed expression of both proteins (right panel). **(C)** Wild-type (WT) or ISG15 knockout HeLa  
598 cells were infected with *Listeria* for 16 h at MOI 25 after transfection of FLAG-RNF213 as in (B).  
599 Intracellular *Listeria* were quantified as in (A) and the percentage of intracellular bacteria relative to mock  
600 plasmid-transfected cells is shown (AVG  $\pm$  SEM, n=3 independent experiments, two-tailed unpaired t-test,  
601 \*\*\*  $p < 0.001$ ) (left panel). Immunoblots against FLAG and ISG15 with tubulin as loading control  
602 confirmed expression of FLAG-RNF213 and the absence of ISG15 in the KO cells (right panel). **(D)** Wild-  
603 type (WT) or RNF213 knockout HeLa cells were infected with *Listeria* for 16 h at MOI 25 after transfection  
604 of HA-ISG15 as in (B). Intracellular *Listeria* were quantified as in (A) and the percentage of intracellular  
605 bacteria relative to mock plasmid-transfected cells is shown (AVG  $\pm$  SEM, n=3 independent experiments,  
606 two-tailed unpaired t-test, \*\*  $p < 0.01$ , \*\*\*  $p < 0.001$ ) (left panel). Immunoblots against RNF213 and HA  
607 with tubulin as loading control confirmed expression of HA-ISG15 and the absence of RNF213 in the KO  
608 cells (right panel).

#### 609 **Figure 6. RNF213 decorates intracellular *Listeria***

610 **(A)** Representative images of HeLa cells transfected with eGFP-RNF213 and counterstained for lipid  
611 droplets (LDs). Following transfection cells were left untreated or infected with *Listeria monocytogenes*  
612 EGD for 24 h. Scale bars in the pictures and insets are respectively 10 microns and 1 micron. White arrows

613 indicate co-localization between RNF213 and lipid droplets or instances of RNF213 co-localization with  
614 intracellular bacteria. **(B)** LDs in uninfected (n=66 cells) and *Listeria*-infected cells (n=40 cells) from (A)  
615 were quantified with Fiji and the percentage of LDs per cell that co-localized with RNF213 was calculated,  
616 showing no difference in co-localization between uninfected and *Listeria*-infected cells (two-tailed  
617 unpaired t-test, AVG uninfected = 68.29%, AVG *Listeria*-infected = 67.14%). **(C)** Representative images  
618 of HeLa cells transfected with eGFP-RNF213 and infected for 18 hours with *Listeria monocytogenes* EGD  
619 stably expressing mCherry. Scale bars in the pictures and insets are respectively 10 microns and 0.5 micron.  
620 **(D)** Intracellular *Listeria* from (C) were quantified with Imaris 9.6 and the percentage of *Listeria* that was  
621 decorated by eGFP-RNF213 was calculated for each field by mapping the cell surface, enumerating  
622 intracellular bacteria and quantifying bacteria that colocalized with GFP-RNF213 (defined as bacteria  
623 within 0.5  $\mu\text{m}$  of RNF213, see methods for more detail). At least 200 cells were counted per experiment,  
624 and data were compiled from 3 independent experiments indicating that on average 37.44% of *Listeria* was  
625 decorated by RNF213.

#### 626 **Figure 7. RNF213 counteracts *Listeria* infection *in vivo***

627 **(A-B)** RNF213  $-/-$  and RNF213  $+/+$  mice were infected intravenously with  $5 \times 10^5$  *Listeria*  
628 *monocytogenes* EGD. Spleen (A) and liver (B) were isolated following 24 h (n=5 for both genotypes), 48  
629 h (n= 4 for RNF213  $-/-$  and n=5 for RNF213  $+/+$ ) and 72 h of infection (n=5 for both genotypes). Colony  
630 forming Units (CFUs) per organ were counted by serial dilution and replating; dots and squares depict  
631 individual animals (AVG  $\pm$  SEM, Mann–Whitney test, \*  $p < 0.05$  and \*\*  $p < 0.01$ , five data points fell  
632 below detection limit in the liver). RNF213  $-/-$  mice are dramatically more susceptible to *Listeria* as  
633 evidenced by significantly higher CFUs at all three time points in the spleen and at 72 h in the liver.

#### 634 **Figure 8. The RNF213 E3 module is required for its antimicrobial activity**

635 **(A)** GST pull down with ISG15 followed by immunoblotting shows that 3xFLAG-RNF213 $\Delta\text{C}$  binds to  
636 ISG15 similar to full length 3xFLAG-RNF213. Beads coated with GST-ISG15 were mixed with a lysate  
637 of HEK293T cells expressing full length 3xFLAG-RNF213, 3xFLAG-RNF213 $\Delta\text{C}$  or the complementary  
638 C-terminal fragment of RNF213 and bound proteins were analyzed by immunoblot against FLAG and GST.  
639 **(B)** FLAG immunoprecipitation was performed from lysates of HEK293T cells expressing 3xFLAG-  
640 RNF213, 3xFLAG-RNF213 $\Delta\text{C}$  or FLAG-eGFP as control. After immunoprecipitation, beads were mixed  
641 with a lysate of HEK293T cells expressing HA-ISG15 and the ISGylation machinery (E1, E2, E3).  
642 3xFLAG-RNF213 $\Delta\text{C}$  was capable of pulling down ISGylated proteins similar to 3xFLAG-RNF213, while  
643 FLAG-eGFP was not. **(C)** HeLa cells were infected with *Listeria monocytogenes* EGD for 4 h at MOI 25.  
644 24 h prior to infection, HeLa cells were transfected with plasmids encoding 3xFLAG-RNF213 or 3xFLAG-  
645 RNF213 $\Delta\text{C}$  or with an empty vector (mock) as control. Intracellular *Listeria* were quantified after serial  
646 dilution by counting colony-forming units (CFUs) in a gentamycin assay. The percentage of intracellular

647 bacteria relative to mock plasmid-transfected cells is shown (AVG  $\pm$  SEM, n=3 independent experiments,  
648 two-tailed unpaired t-test, \*\*\*\* p < 0.0001) (left panel). Immunoblots against FLAG with tubulin as loading  
649 control confirmed expression of FLAG-RNF213, FLAG-RNF213 $\Delta$ C (right panel). **(D)** Representative  
650 images of HeLa cells transfected with eGFP-RNF213 $\Delta$ C and infected for 18 hours with *Listeria*  
651 *monocytogenes* EGD stably expressing mCherry. Scale bars in the pictures and insets are respectively 10  
652 microns and 0.5 micron. eGFP-RNF213 $\Delta$ C showed a diffused cellular staining, not decorating intracellular  
653 *Listeria*.

### 654 **Supplementary Figure 1. RNF213 binds to premature, mature and non-conjugatable ISG15**

655 **(A-F)** HIV-1 GAG protein was genetically fused to wild-type ISG15, non-conjugatable ISG15AA or the  
656 precursor form of ISG15, and transiently expressed in HEK293T cells treated or not with IFN-I. Virus-like  
657 particles (VLPs) were purified, lysed and protein were digested into peptides for identification and  
658 quantification by LC-MS/MS. Volcano plots show the result of a t-test to compare VLPs containing ISG15  
659 versus VLPs containing *E.coli* dihydrofolate reductase (eDHFR) as negative control (n=4 replicates). The  
660 fold change (in log<sub>2</sub>) of each protein is shown on the x-axis, while the statistical significance (-log P-value)  
661 is shown on the y-axis. Proteins outside the curved lines represent specific ISG15 interaction partners.  
662 Proteins identified as common ISG15 interaction partners in all six screens are indicated (n=29) and listed  
663 in Table S1. The volcano plot in (A) is identical to the volcano plot in Figure 1B.

### 664 **Supplementary Figure 2. Binding of RNF213 requires both N- and C-terminal domains of ISG15**

665 **(A-C)** HIV-1 GAG protein was genetically fused to ISG15AA (A), the ISG15 N-terminal (B) or the ISG15  
666 C-terminal domain (C). Constructs were transiently expressed in HEK293T and Virotrap experiments were  
667 performed as in Fig. 1 and Supplementary Fig. 1 (n=3 replicates). Common ISG15 interaction partners from  
668 Supplementary Fig. 1 are annotated on the volcano plots and listed in Table S1. **(D)** Heatmap showing the  
669 expression level (log<sub>2</sub> LFQ intensity) of ISG15, eDHFR, HIV-1 GAG and common ISG15 interaction  
670 partners from Supplementary Fig. 1 after non-supervised hierarchical clustering. On the right side, the same  
671 heatmap is shown with originally missing values colored in gray. All common ISG15 interactors including  
672 RNF213 bind to full length ISG15, but not to the C- or N-terminal domain alone.

### 673 **Supplementary Figure 3. ISG15 co-immunoprecipitation coupled to mass spectrometry**

674 **(A-C)** Immunoprecipitation using HA antibodies was performed from lysates of HEK293T or HeLa cells  
675 transfected with HA-ISG15AA or mock and treated with IFN-I for 24h or 48h. Pulled down proteins were  
676 digested with trypsin on the beads prior to their identification and quantification by LC-MS/MS. Volcano  
677 plots show the result of a t-test to compare ISG15 pull downs versus mock control (n=3 replicates). The  
678 fold change (in log<sub>2</sub>) of each protein is shown on the x-axis, while the statistical significance (-log P-value)  
679 is shown on the y-axis. Proteins outside the curved lines represent significantly enriched proteins. Except  
680 for ISG15 itself, no interacting proteins were identified in the ISG15 pull down experiments **(D)** Venn

681 diagram showing the overlap between the common ISG15 interaction partners identified by Virotrap (n=29,  
682 Supplementary Fig. 1) and GST pull down in HEK293T cells (Figure 1D). Next to ISG15 itself, only  
683 RNF213 overlaps between those two type of experiments.

684 **Supplementary Figure 4. RNF213 binds non-covalently to ISGylated proteins but not to**  
685 **Ubiquitinated proteins**

686 **(A)** GFP immunoprecipitation was performed from lysates of HEK293T cells expressing eGFP-RNF213  
687 or FLAG-eGFP in combination with HA-ISG15 and the ISGylation machinery (E1, E2, E3). A smear of  
688 ISGylated co-immunoprecipitated proteins was detected with eGFP-RNF213, but not with FLAG-eGFP.  
689 **(B)** FLAG immunoprecipitation was performed in HEK293T cells expressing 3xFLAG-RNF213 or FLAG-  
690 eGFP in combination with HA-ISG15 and the ISGylation machinery (E1, E2, E3). After  
691 immunoprecipitation, beads were washed either with a buffer containing 1% Triton-X-100 or with a buffer  
692 containing 1% Triton-X-100 and 1 % SDS to remove ISGylated proteins that were non-covalently bound  
693 to FLAG-RNF213. **(C)** Workflow showing the strategy for co-immunoprecipitation of ISGylated proteins  
694 with separate expression of FLAG-RNF213 and ISGylated proteins. FLAG immunoprecipitation is  
695 performed from a lysate of HEK293T cells expressing 3xFLAG-RNF213. After binding of FLAG-RNF213,  
696 beads are washed and subsequently mixed with a lysate of HEK293T cells expressing HA-ISG15 and the  
697 ISGylation machinery (E1, E2, E3). In this way, we can exclude that (part of) the smear of co-  
698 immunoprecipitated ISGylated proteins is actually derived from ISGylated RNF213 itself. **(D)** FLAG  
699 immunoprecipitation was performed from lysates of HEK293T cells expressing 3xFLAG-RNF213, FLAG-  
700 RNF31 (HOIP) or FLAG-eGFP as control. According to the workflow in (C), after binding of the bait  
701 protein beads were mixed with a lysate of HEK293T cells expressing HA-ISG15 and the ISGylation  
702 machinery (E1, E2, E3). While FLAG-RNF213 was capable of pulling down ISGylated proteins, FLAG-  
703 RNF31 or FLAG-eGFP were not. **(E)** FLAG immunoprecipitation of 3xFLAG-RNF213, FLAG-RNF31 or  
704 FLAG-eGFP was performed as in (D), but after binding of the bait protein beads were mixed with a lysate  
705 of HEK293T cells expressing HA-Ubiquitin. FLAG-RNF31 efficiently pulled down ubiquitinated proteins,  
706 but FLAG-RNF213 and FLAG-eGFP did not.

707 **Supplementary Figure 5. RNF213 deficiency does not destabilize lipid droplets in macrophages.**

708 **(A)** THP-1 or primary human monocytes cells were cultured in the presence of 10 mM BSA-conjugated  
709 oleic acid. Lipid droplets (LDs)-enriched fractions were isolated by ultracentrifugation floatation assay on  
710 a sucrose step-gradient. Membrane bound fraction proteins and cytosolic proteins were isolated by  
711 ultracentrifugation sedimentation assay. SDS-PAGE and silver staining shows equal protein loading for  
712 each fraction (left panel). Immunoblotting reveals that RNF213 is mainly associated to lipid droplet.  
713 Immunoblotting against PLIN1, PLIN2, RAB18 and AUP1 shows efficient LD isolation. Immunoblotting  
714 against CNX and BIP was used as markers for the membrane fraction. Immunoblotting against GAPDH

715 was used as a marker for the cytosolic fraction. **(B)** Representative images of BMDM cells derived from  
716 RNF213 *+/+* or RNF213 *-/-* mice. Cells were treated with 10 ng/ml interferon- $\beta$ , 200  $\mu$ M mM BSA-  
717 conjugated oleic acid or both 24 h prior to fixation. Scale bars in the pictures are 10 microns. **(C)** At least  
718 100 cells were used to count the volume (voxel, left panel) and number (right panel) of lipid droplets per  
719 cell (right panel) from five different fields containing each 20 to 30 cells. Quantification was performed  
720 with the Volocity software. No differences in volume or number of lipid droplets were observed between  
721 RNF213 *+/+* and RNF213 *-/-* cells (AVG  $\pm$  SEM, n=5 fields, two-tailed unpaired t-test), indicating that  
722 RNF213 deficiency does not lead to reduced stability of lipid droplets in macrophages.

### 723 **Supplementary Figure 6. IFN-I induction and regulation of RNF213 and ISG15 in human cell lines**

724 **(A)** HeLa, A549 or THP-1 cells were either untreated or treated with the indicated type of interferon ( $\alpha/\beta/\gamma$ )  
725 for 48h prior to lysis and immunoblotting against RNF213, ISG15 and tubulin as loading control. RNF213  
726 and ISG15 are co-induced, primarily by IFN- $\alpha$  and  $\beta$ . **(B)** HeLa cells were treated or not with interferon- $\beta$   
727 prior to lysis and distribution of RNF213 between the soluble and membrane-associated fraction was  
728 quantified by immunoblotting. Purity of the soluble and membrane associated fractions was evaluated using  
729 GAPDH and Ribophorin I as respective marker proteins (AVG  $\pm$  STDEV, n=4 replicates). Interferon  
730 treatment led to a non-significant decrease and increase of RNF213 in the soluble and membrane fractions,  
731 respectively. **(C)** Immunoblots against UBE1L and tubulin as loading control confirmed knockdown of  
732 UBE1L in the experiment shown in Fig. 3B.

### 733 **Supplementary Figure 7. RNF213 counteracts *in vitro* infection**

734 **(A)** A549 cells were infected with RSV-A2 for up to six days at MOI 0.001. Immunoblotting against RSV-  
735 G confirmed infection, while pSTAT1 indicated type-I interferon signaling especially 2 to 4 days post  
736 infection. Tubulin was used as loading control. **(B)** HeLa cells were infected with coxsackievirus B3  
737 (CVB3) up to 48 h at MOI 0.01. Immunoblotting against coxsackie viral protein VP1 confirmed infection,  
738 while the absence of pSTAT1 indicated no induction of type-I interferon signaling. **(C)** HeLa cells were  
739 infected with *Listeria monocytogenes* EGD up to 48 h at a multiplicity of infection (MOI) of 25.  
740 Immunoblotting against *Listeria* EF-TU confirmed infection, while phosphorylated STAT1 (pSTAT1,  
741 Y701) showed a slight induction of type-I interferon signaling 24 h post infection. Tubulin was used as  
742 loading control. **(D)** HeLa cells were infected with *Listeria* for 16 h at MOI 25. The percentage of bacteria  
743 inside HeLa cells transfected with a pool of siRNAs against RNF213 (siRNF213 pool, used in all other  
744 experiments) or individual siRNAs against RNF213 (siRNF213 D, siRNF213 INV6645, siRNF213  
745 INV4009) is shown relative to siScramble-transfected cells (AVG  $\pm$  SEM, n=3 independent experiments,  
746 two-tailed unpaired t-test, \* p < 0.05, \*\* p < 0.01 and \*\*\* p < 0.001). **(E)** HeLa cells were infected with  
747 *Listeria* for 16 h at MOI 25. 48 h prior to infection, cells were transfected with a pool of siRNAs targeting  
748 RNF213 (siRNF213) or a pool of non-targeting scrambled siRNAs (siScramble) as control. Additionally,



749 24 h prior to infection cells were transfected with a plasmid encoding HA-ISG15 or with an empty vector  
750 (mock) as control. Intracellular *Listeria* were quantified after serial dilution by counting colony-forming  
751 units (CFUs) in a gentamycin assay. The percentage of intracellular bacteria relative to mock transfected  
752 cells is shown (AVG  $\pm$  SEM, n=3 independent experiments, two-tailed unpaired t-test, \*\* p < 0.01, \*\*\* p  
753 < 0.001).

#### 754 **Supplementary Figure 8. RNF213 knockout mice are strongly susceptible to *Listeria* infection**

755 (A) Generation of C57BL/6J RNF213 KO mice. The largest exon (exon 28) of the *Rnf213* gene is 3603  
756 bp and was targeted by 2 gRNAs, *Rnf213\_gRNA1* with protospacer sequence 5'  
757 CAGAGCTTCGGAACCTTTGCT 3' and *Rnf213\_gRNA2*, with protospacer sequence 5'  
758 TGTGCCCTCATCAACCGTC 3'. The distance between the Cas9 cut sites of both gRNAs is 2842 bp.  
759 Screening for the deletion between both gRNAs was done with primers *Rnf213\_FW1* (5'  
760 AGTTTCTTGATCTCTTCCCC 3') and *Rnf213\_Rev6* (5' CTCCTCCGTCAGATCCCTA 3') generating  
761 a wild type PCR fragment of 3363 bp and a fragment of 523 bp in case of an exact deletion between both  
762 Cas9 cut sites. Several founders showed a deletion band. Founder 290-7 was further analyzed and showed  
763 a deletion of 2854 bp, resulting in a frameshift and premature stopcodons resulting in mouse line B6J-  
764 RNF213<sup>em11rc</sup>. This line was used for further breeding and the generation of RNF213<sup>-/-</sup> and RNF213<sup>+/+</sup>  
765 littermate control mice. (B-E) RNF213<sup>-/-</sup> and RNF213<sup>+/+</sup> littermates were infected intravenously with 5  
766  $\times 10^5$  *Listeria monocytogenes* EGD. Liver and spleen were isolated following 72 h of infection, and CFUs  
767 per organ were counted by serial dilution and replating; dots and squares depict individual animals (AVG  
768  $\pm$  SEM, Mann-Whitney test, \*\* p < 0.01 and \*\*\* p < 0.001). (B-C) Six mice per genotypes were used in  
769 experiment 2. (D-E) Seven RNF213<sup>-/-</sup> and eight RNF213<sup>+/+</sup> mice were used in experiment 3 (note that  
770 the results of experiment 1 are shown in Fig. 7). Thus, in three independent experiments, 72 h post infection  
771 RNF213<sup>-/-</sup> animals showed significantly higher bacterial loads in liver (~1 log) and spleen (~5 logs)  
772 compared to WT littermate controls.

#### 773 **Supplementary figure 9. The RNF213 E3 module is required for lipid droplet localization**

774 (A) Representative images of HeLa cells transfected with eGFP-RNF213 or eGFP-RNF213 $\Delta$ C for 72  
775 hours. Following transfection cells were left untreated for 18 h and then fixed. Scale bars in the pictures  
776 and insets are respectively 10 microns and 0.5 microns. While eGFP-RNF213 adopts a spherical pattern  
777 reminiscent of lipid droplet localization reported by Sugihara et al., 2019, eGFP-RNF213 $\Delta$ C shows a  
778 diffuse cellular staining. (B) Representative images of an independent experiment in which HeLa cells  
779 were transfected with eGFP-RNF213 $\Delta$ C and counterstained for lipid droplets. 72 hours post transfection  
780 cells were left untreated for 18h and then fixed. Scale bars in the pictures are 10 microns. Again, eGFP-  
781 RNF213 $\Delta$ C was spread throughout the cell without co-localization to lipid droplets.

782 **References**

- 783 1 Yuan, W. & Krug, R. M. Influenza B virus NS1 protein inhibits conjugation of the interferon (IFN)-  
784 induced ubiquitin-like ISG15 protein. *The EMBO journal* **20**, 362-371, doi:10.1093/emboj/20.3.362  
785 (2001).
- 786 2 Zhao, C. *et al.* The UbcH8 ubiquitin E2 enzyme is also the E2 enzyme for ISG15, an IFN-alpha/beta-  
787 induced ubiquitin-like protein. *Proc Natl Acad Sci U S A* **101**, 7578-7582,  
788 doi:10.1073/pnas.0402528101 (2004).
- 789 3 Dastur, A., Beaudenon, S., Kelley, M., Krug, R. M. & Huijbregtse, J. M. Herc5, an interferon-induced  
790 HECT E3 enzyme, is required for conjugation of ISG15 in human cells. *The Journal of biological*  
791 *chemistry* **281**, 4334-4338, doi:M512830200 [pii] 10.1074/jbc.M512830200 (2006).
- 792 4 Zou, W. & Zhang, D. E. The interferon-inducible ubiquitin-protein isopeptide ligase (E3) EFP also  
793 functions as an ISG15 E3 ligase. *The Journal of biological chemistry* **281**, 3989-3994,  
794 doi:10.1074/jbc.M510787200 (2006).
- 795 5 Okumura, F., Zou, W. & Zhang, D. E. ISG15 modification of the eIF4E cognate 4EHP enhances cap  
796 structure-binding activity of 4EHP. *Genes Dev* **21**, 255-260, doi:10.1101/gad.1521607 (2007).
- 797 6 Radoshevich, L. *et al.* ISG15 counteracts *Listeria monocytogenes* infection. *eLife* **4**,  
798 doi:10.7554/eLife.06848 (2015).
- 799 7 Malakhova, O., Malakhov, M., Hetherington, C. & Zhang, D. E. Lipopolysaccharide activates the  
800 expression of ISG15-specific protease UBP43 via interferon regulatory factor 3. *The Journal of*  
801 *biological chemistry* **277**, 14703-14711, doi:10.1074/jbc.M111527200 (2002).
- 802 8 Bazzigher, L., Pavlovic, J., Haller, O. & Staeheli, P. Mx genes show weaker primary response to  
803 virus than other interferon-regulated genes. *Virology* **186**, 154-160 (1992).
- 804 9 Lai, C. *et al.* Mice lacking the ISG15 E1 enzyme UbE1L demonstrate increased susceptibility to both  
805 mouse-adapted and non-mouse-adapted influenza B virus infection. *Journal of virology* **83**, 1147-  
806 1151, doi:10.1128/JVI.00105-08 (2009).
- 807 10 Gonzalez-Sanz, R. *et al.* ISG15 Is Upregulated in Respiratory Syncytial Virus Infection and Reduces  
808 Virus Growth through Protein ISGylation. *Journal of virology* **90**, 3428-3438,  
809 doi:10.1128/JVI.02695-15 (2016).
- 810 11 Rahnefeld, A. *et al.* Ubiquitin-like protein ISG15 (interferon-stimulated gene of 15 kDa) in host  
811 defense against heart failure in a mouse model of virus-induced cardiomyopathy. *Circulation* **130**,  
812 1589-1600, doi:10.1161/CIRCULATIONAHA.114.009847 (2014).
- 813 12 Kespohl, M. *et al.* Protein modification with ISG15 blocks coxsackievirus pathology by antiviral and  
814 metabolic reprogramming. *Sci Adv* **6**, eaay1109, doi:10.1126/sciadv.aay1109 (2020).
- 815 13 Zhao, C. *et al.* Influenza B virus non-structural protein 1 counteracts ISG15 antiviral activity by  
816 sequestering ISGylated viral proteins. *Nat Commun* **7**, 12754, doi:10.1038/ncomms12754 (2016).
- 817 14 Lindner, H. A. *et al.* The papain-like protease from the severe acute respiratory syndrome  
818 coronavirus is a deubiquitinating enzyme. *Journal of virology* **79**, 15199-15208,  
819 doi:10.1128/JVI.79.24.15199-15208.2005 (2005).
- 820 15 Mielech, A. M., Kilianski, A., Baez-Santos, Y. M., Mesecar, A. D. & Baker, S. C. MERS-CoV papain-  
821 like protease has deISGylating and deubiquitinating activities. *Virology* **450-451**, 64-70,  
822 doi:10.1016/j.virol.2013.11.040 (2014).
- 823 16 Shin, D. *et al.* Papain-like protease regulates SARS-CoV-2 viral spread and innate immunity.  
824 *Nature*, doi:10.1038/s41586-020-2601-5 (2020).
- 825 17 Klemm, T. *et al.* Mechanism and inhibition of the papain-like protease, PLpro, of SARS-CoV-2.  
826 *EMBO J*, e106275, doi:10.15252/embj.2020106275 (2020).
- 827 18 Swatek, K. N. *et al.* Irreversible inactivation of ISG15 by a viral leader protease enables alternative  
828 infection detection strategies. *Proceedings of the National Academy of Sciences of the United*  
829 *States of America* **115**, 2371-2376, doi:10.1073/pnas.1710617115 (2018).



- 830 19 Kimmey, J. M. *et al.* The impact of ISGylation during Mycobacterium tuberculosis infection in mice.  
831 *Microbes and infection* **19**, 249-258, doi:10.1016/j.micinf.2016.12.006 (2017).
- 832 20 Napolitano, A. *et al.* Cysteine-Reactive Free ISG15 Generates IL-1beta-Producing CD8alpha(+)  
833 Dendritic Cells at the Site of Infection. *Journal of immunology* **201**, 604-614,  
834 doi:10.4049/jimmunol.1701322 (2018).
- 835 21 Durfee, L. A., Lyon, N., Seo, K. & Huibregtse, J. M. The ISG15 conjugation system broadly targets  
836 newly synthesized proteins: implications for the antiviral function of ISG15. *Mol Cell* **38**, 722-732,  
837 doi:10.1016/j.molcel.2010.05.002 (2010).
- 838 22 D'Cunha, J. *et al.* In vitro and in vivo secretion of human ISG15, an IFN-induced  
839 immunomodulatory cytokine. *Journal of immunology (Baltimore, Md. : 1950)* **157**, 4100-4108  
840 (1996).
- 841 23 Swaim, C. D., Scott, A. F., Canadeo, L. A. & Huibregtse, J. M. Extracellular ISG15 Signals Cytokine  
842 Secretion through the LFA-1 Integrin Receptor. *Mol Cell* **68**, 581-590 e585,  
843 doi:10.1016/j.molcel.2017.10.003 (2017).
- 844 24 Swaim, C. D. *et al.* Modulation of Extracellular ISG15 Signaling by Pathogens and Viral Effector  
845 Proteins. *Cell reports* **31**, 107772, doi:10.1016/j.celrep.2020.107772 (2020).
- 846 25 Werneke, S. W. *et al.* ISG15 is critical in the control of Chikungunya virus infection independent of  
847 UbE1L mediated conjugation. *PLoS pathogens* **7**, e1002322, doi:10.1371/journal.ppat.1002322  
848 (2011).
- 849 26 Malakhov, M. P., Malakhova, O. A., Kim, K. I., Ritchie, K. J. & Zhang, D. E. UBP43 (USP18) specifically  
850 removes ISG15 from conjugated proteins. *The Journal of biological chemistry* **277**, 9976-9981,  
851 doi:10.1074/jbc.M109078200 (2002).
- 852 27 Basters, A. *et al.* Structural basis of the specificity of USP18 toward ISG15. *Nature structural &*  
853 *molecular biology* **24**, 270-278, doi:10.1038/nsmb.3371 (2017).
- 854 28 Malakhova, O. A. *et al.* UBP43 is a novel regulator of interferon signaling independent of its ISG15  
855 isopeptidase activity. *The EMBO journal* **25**, 2358-2367, doi:10.1038/sj.emboj.7601149 (2006).
- 856 29 Goldmann, T. *et al.* USP18 lack in microglia causes destructive interferonopathy of the mouse  
857 brain. *EMBO J* **34**, 1612-1629, doi:10.15252/embj.201490791 (2015).
- 858 30 Meuwissen, M. E. *et al.* Human USP18 deficiency underlies type 1 interferonopathy leading to  
859 severe pseudo-TORCH syndrome. *J Exp Med* **213**, 1163-1174, doi:10.1084/jem.20151529 (2016).
- 860 31 Zhang, X. *et al.* Human intracellular ISG15 prevents interferon-alpha/beta over-amplification and  
861 auto-inflammation. *Nature* **517**, 89-93, doi:10.1038/nature13801 (2015).
- 862 32 Speer, S. D. *et al.* ISG15 deficiency and increased viral resistance in humans but not mice. *Nature*  
863 *communications* **7**, 11496, doi:10.1038/ncomms11496 (2016).
- 864 33 Du, Y. *et al.* LRRC25 inhibits type I IFN signaling by targeting ISG15-associated RIG-I for autophagic  
865 degradation. *The EMBO journal* **37**, 351-366, doi:10.15252/embj.201796781 (2018).
- 866 34 Nakashima, H., Nguyen, T., Goins, W. F. & Chiocca, E. A. Interferon-stimulated gene 15 (ISG15)  
867 and ISG15-linked proteins can associate with members of the selective autophagic process,  
868 histone deacetylase 6 (HDAC6) and SQSTM1/p62. *The Journal of biological chemistry* **290**, 1485-  
869 1495, doi:10.1074/jbc.M114.593871 (2015).
- 870 35 Malakhova, O. A. & Zhang, D. E. ISG15 inhibits Nedd4 ubiquitin E3 activity and enhances the innate  
871 antiviral response. *The Journal of biological chemistry* **283**, 8783-8787,  
872 doi:10.1074/jbc.C800030200 (2008).
- 873 36 Okumura, A., Pitha, P. M. & Harty, R. N. ISG15 inhibits Ebola VP40 VLP budding in an L-domain-  
874 dependent manner by blocking Nedd4 ligase activity. *Proceedings of the National Academy of*  
875 *Sciences of the United States of America* **105**, 3974-3979, doi:10.1073/pnas.0710629105 (2008).
- 876 37 Yeh, Y. H., Yang, Y. C., Hsieh, M. Y., Yeh, Y. C. & Li, T. K. A negative feedback of the HIF-1alpha  
877 pathway via interferon-stimulated gene 15 and ISGylation. *Clin Cancer Res* **19**, 5927-5939,  
878 doi:10.1158/1078-0432.CCR-13-0018 (2013).

- 879 38 Huttlin, E. L. *et al.* Architecture of the human interactome defines protein communities and  
880 disease networks. *Nature* **545**, 505-+, doi:10.1038/nature22366 (2017).
- 881 39 Rolland, T. *et al.* A Proteome-Scale Map of the Human Interactome Network. *Cell* **159**, 1212-1226,  
882 doi:10.1016/j.cell.2014.10.050 (2014).
- 883 40 Hubel, P. *et al.* A protein-interaction network of interferon-stimulated genes extends the innate  
884 immune system landscape. *Nature immunology*, doi:10.1038/s41590-019-0323-3 (2019).
- 885 41 Hein, M. Y. *et al.* A human interactome in three quantitative dimensions organized by  
886 stoichiometries and abundances. *Cell* **163**, 712-723, doi:10.1016/j.cell.2015.09.053 (2015).
- 887 42 Eyckerman, S. *et al.* Trapping mammalian protein complexes in viral particles. *Nature*  
888 *communications* **7**, 11416, doi:10.1038/ncomms11416 (2016).
- 889 43 Kadowaki, H. *et al.* Pre-emptive Quality Control Protects the ER from Protein Overload via the  
890 Proximity of ERAD Components and SRP. *Cell Rep* **13**, 944-956, doi:10.1016/j.celrep.2015.09.047  
891 (2015).
- 892 44 Papadopoulos, C. *et al.* VCP/p97 cooperates with YOD1, UBXD1 and PLAA to drive clearance of  
893 ruptured lysosomes by autophagy. *EMBO J* **36**, 135-150, doi:10.15252/embj.201695148 (2017).
- 894 45 Kondo, H. *et al.* p47 is a cofactor for p97-mediated membrane fusion. *Nature* **388**, 75-78,  
895 doi:10.1038/40411 (1997).
- 896 46 LaLonde, D. P. & Bretscher, A. The UBX protein SAKS1 negatively regulates endoplasmic reticulum-  
897 associated degradation and p97-dependent degradation. *J Biol Chem* **286**, 4892-4901,  
898 doi:10.1074/jbc.M110.158030 (2011).
- 899 47 Arumughan, A. *et al.* Quantitative interaction mapping reveals an extended UBX domain in ASPL  
900 that disrupts functional p97 hexamers. *Nat Commun* **7**, 13047, doi:10.1038/ncomms13047  
901 (2016).
- 902 48 Lee, J. J. *et al.* Complex of Fas-associated factor 1 (FAF1) with valosin-containing protein (VCP)-  
903 Npl4-Ufd1 and polyubiquitinated proteins promotes endoplasmic reticulum-associated  
904 degradation (ERAD). *J Biol Chem* **288**, 6998-7011, doi:10.1074/jbc.M112.417576 (2013).
- 905 49 Ajibade, A. A., Wang, H. Y. & Wang, R. F. Cell type-specific function of TAK1 in innate immune  
906 signaling. *Trends Immunol* **34**, 307-316, doi:10.1016/j.it.2013.03.007 (2013).
- 907 50 Hirata, Y., Takahashi, M., Morishita, T., Noguchi, T. & Matsuzawa, A. Post-Translational  
908 Modifications of the TAK1-TAB Complex. *Int J Mol Sci* **18**, doi:10.3390/ijms18010205 (2017).
- 909 51 Keusekotten, K. *et al.* Multivalent interactions of the SUMO-interaction motifs in RING finger  
910 protein 4 determine the specificity for chains of the SUMO. *The Biochemical journal* **457**, 207-214,  
911 doi:10.1042/BJ20130753 (2014).
- 912 52 Hurley, J. H., Lee, S. & Prag, G. Ubiquitin-binding domains. *Biochem J* **399**, 361-372,  
913 doi:10.1042/BJ20061138 (2006).
- 914 53 Kirisako, T. *et al.* A ubiquitin ligase complex assembles linear polyubiquitin chains. *EMBO J* **25**,  
915 4877-4887, doi:10.1038/sj.emboj.7601360 (2006).
- 916 54 Liu, W. *et al.* Identification of RNF213 as a susceptibility gene for moyamoya disease and its  
917 possible role in vascular development. *PLoS One* **6**, e22542, doi:10.1371/journal.pone.0022542  
918 (2011).
- 919 55 Morito, D. *et al.* Moyamoya disease-associated protein mysterin/RNF213 is a novel AAA+ ATPase,  
920 which dynamically changes its oligomeric state. *Scientific reports* **4**, 4442, doi:10.1038/srep04442  
921 (2014).
- 922 56 Uhlen, M. *et al.* Proteomics. Tissue-based map of the human proteome. *Science* **347**, 1260419,  
923 doi:10.1126/science.1260419 (2015).
- 924 57 Sugihara, M. *et al.* The AAA+ ATPase/ubiquitin ligase mysterin stabilizes cytoplasmic lipid droplets.  
925 *The Journal of cell biology*, doi:10.1083/jcb.201712120 (2019).
- 926 58 Zhang, J. *et al.* Flaviviruses Exploit the Lipid Droplet Protein AUP1 to Trigger Lipophagy and Drive  
927 Virus Production. *Cell Host Microbe* **23**, 819-831 e815, doi:10.1016/j.chom.2018.05.005 (2018).

- 928 59 Sonobe, S. *et al.* Increased vascular MMP-9 in mice lacking RNF213: moyamoya disease  
929 susceptibility gene. *Neuroreport* **25**, 1442-1446, doi:10.1097/WNR.000000000000289 (2014).
- 930 60 Kobayashi, H. *et al.* Biochemical and Functional Characterization of RNF213 (Mysterin) R4810K, a  
931 Susceptibility Mutation of Moyamoya Disease, in Angiogenesis In Vitro and In Vivo. *J Am Heart*  
932 *Assoc* **4**, doi:10.1161/JAHA.115.002146 (2015).
- 933 61 Zhang, Y. *et al.* The in vivo ISGylome links ISG15 to metabolic pathways and autophagy upon  
934 *Listeria monocytogenes* infection. *Nature communications* **10**, 5383, doi:10.1038/s41467-019-  
935 13393-x (2019).
- 936 62 Lenschow, D. J. *et al.* IFN-stimulated gene 15 functions as a critical antiviral molecule against  
937 influenza, herpes, and Sindbis viruses. *Proceedings of the National Academy of Sciences of the*  
938 *United States of America* **104**, 1371-1376, doi:10.1073/pnas.0607038104 (2007).
- 939 63 Cramer, M. *et al.* MxB is an interferon-induced restriction factor of human herpesviruses. *Nature*  
940 *communications* **9**, 1980, doi:10.1038/s41467-018-04379-2 (2018).
- 941 64 Ahel, J. *et al.* Moyamoya disease factor RNF213 is a giant E3 ligase with a dynein-like core and a  
942 distinct ubiquitin-transfer mechanism. *eLife* **9**, doi:10.7554/eLife.56185 (2020).
- 943 65 Haas, A. L., Ahrens, P., Bright, P. M. & Ankel, H. Interferon induces a 15-kilodalton protein  
944 exhibiting marked homology to ubiquitin. *J Biol Chem* **262**, 11315-11323 (1987).
- 945 66 Chick, J. M. *et al.* Defining the consequences of genetic variation on a proteome-wide scale.  
946 *Nature* **534**, 500-505, doi:10.1038/nature18270 (2016).
- 947 67 Olzmann, J. A. & Carvalho, P. Dynamics and functions of lipid droplets. *Nat Rev Mol Cell Biol* **20**,  
948 137-155, doi:10.1038/s41580-018-0085-z (2019).
- 949 68 Piccolis, M. *et al.* Probing the Global Cellular Responses to Lipotoxicity Caused by Saturated Fatty  
950 Acids. *Mol Cell* **74**, 32-44 e38, doi:10.1016/j.molcel.2019.01.036 (2019).
- 951 69 Takeda, M. *et al.* Moyamoya disease patient mutations in the RING domain of RNF213 reduce its  
952 ubiquitin ligase activity and enhance NF $\kappa$ B activation and apoptosis in an AAA+ domain-  
953 dependent manner. *Biochem Biophys Res Commun* **525**, 668-674, doi:10.1016/j.bbrc.2020.02.024  
954 (2020).
- 955 70 Banh, R. S. *et al.* PTP1B controls non-mitochondrial oxygen consumption by regulating RNF213 to  
956 promote tumour survival during hypoxia. *Nature cell biology* **18**, 803-813, doi:10.1038/ncb3376  
957 (2016).
- 958 71 Myers, M. P. *et al.* TYK2 and JAK2 are substrates of protein-tyrosine phosphatase 1B. *The Journal*  
959 *of biological chemistry* **276**, 47771-47774, doi:10.1074/jbc.C100583200 (2001).
- 960 72 Lu, X. *et al.* PTP1B is a negative regulator of interleukin 4-induced STAT6 signaling. *Blood* **112**,  
961 4098-4108, doi:10.1182/blood-2008-03-148726 (2008).
- 962 73 Saka, H. A. & Valdivia, R. Emerging roles for lipid droplets in immunity and host-pathogen  
963 interactions. *Annu Rev Cell Dev Biol* **28**, 411-437, doi:10.1146/annurev-cellbio-092910-153958  
964 (2012).
- 965 74 den Brok, M. H., Raaijmakers, T. K., Collado-Camps, E. & Adema, G. J. Lipid Droplets as Immune  
966 Modulators in Myeloid Cells. *Trends Immunol* **39**, 380-392, doi:10.1016/j.it.2018.01.012 (2018).
- 967 75 Bosch, M. *et al.* Mammalian lipid droplets are innate immune hubs integrating cell metabolism  
968 and host defense. *Science* **370**, doi:10.1126/science.aay8085 (2020).
- 969 76 Laufman, O., Perrino, J. & Andino, R. Viral Generated Inter-Organellar Contacts Redirect Lipid Flux  
970 for Genome Replication. *Cell* **178**, 275-289 e216, doi:10.1016/j.cell.2019.05.030 (2019).
- 971 77 Sedeyn, K., Schepens, B. & Saelens, X. Respiratory syncytial virus nonstructural proteins 1 and 2:  
972 Exceptional disrupters of innate immune responses. *PLoS Pathog* **15**, e1007984,  
973 doi:10.1371/journal.ppat.1007984 (2019).
- 974 78 Danastas, K., Miranda-Saksena, M. & Cunningham, A. L. Herpes Simplex Virus Type 1 Interactions  
975 with the Interferon System. *Int J Mol Sci* **21**, doi:10.3390/ijms21145150 (2020).

- 976 79 Kuhbacher, A. *et al.* Genome-Wide siRNA Screen Identifies Complementary Signaling Pathways  
977 Involved in Listeria Infection and Reveals Different Actin Nucleation Mechanisms during Listeria  
978 Cell Invasion and Actin Comet Tail Formation. *MBio* **6**, e00598-00515, doi:10.1128/mBio.00598-  
979 15 (2015).
- 980 80 Harty, J. T. & Bevan, M. J. Specific immunity to Listeria monocytogenes in the absence of IFN  
981 gamma. *Immunity* **3**, 109-117, doi:10.1016/1074-7613(95)90163-9 (1995).
- 982 81 Huang, S. *et al.* Immune response in mice that lack the interferon-gamma receptor. *Science* **259**,  
983 1742-1745, doi:10.1126/science.8456301 (1993).
- 984 82 Franco, L. H. *et al.* The Ubiquitin Ligase Smurf1 Functions in Selective Autophagy of  
985 Mycobacterium tuberculosis and Anti-tuberculous Host Defense. *Cell Host Microbe* **22**, 421-423,  
986 doi:10.1016/j.chom.2017.08.005 (2017).
- 987 83 Yoshikawa, Y. *et al.* Listeria monocytogenes ActA-mediated escape from autophagic recognition.  
988 *Nature cell biology* **11**, 1233-1240, doi:10.1038/ncb1967 (2009).
- 989 84 Suzuki, J. & Takaku, A. Cerebrovascular "moyamoya" disease. Disease showing abnormal net-like  
990 vessels in base of brain. *Arch Neurol* **20**, 288-299, doi:10.1001/archneur.1969.00480090076012  
991 (1969).
- 992 85 Scott, R. M. & Smith, E. R. Moyamoya disease and moyamoya syndrome. *N Engl J Med* **360**, 1226-  
993 1237, doi:10.1056/NEJMra0804622 (2009).
- 994 86 Bang, O. Y. *et al.* Moyamoya Disease and Spectrums of RNF213 Vasculopathy. *Transl Stroke Res*,  
995 doi:10.1007/s12975-019-00743-6 (2019).
- 996 87 Hu, J., Luo, J. & Chen, Q. The Susceptibility Pathogenesis of Moyamoya Disease. *World Neurosurg*  
997 **101**, 731-741, doi:10.1016/j.wneu.2017.01.083 (2017).
- 998 88 Ohkubo, K. *et al.* Moyamoya disease susceptibility gene RNF213 links inflammatory and  
999 angiogenic signals in endothelial cells. *Sci Rep* **5**, 13191, doi:10.1038/srep13191 (2015).

## 1 **METHODS**

### 2 **Antibodies**

3 The following primary antibodies were used for immunoblotting: mouse monoclonal anti-ISG15 (F-9, sc-  
4 166755, Santa Cruz Biotechnology), rabbit monoclonal anti-ISG15 (Abcam [EPR3446] ab133346), mouse  
5 monoclonal anti-ubiquitin (P4D1, #sc-8017, Santa Cruz Biotechnology), mouse monoclonal anti- $\alpha$ -tubulin  
6 (B-7, #sc-5286, Santa Cruz Biotechnology), mouse monoclonal anti-GST (B-14, #sc-138, Santa Cruz  
7 Biotechnology), rabbit polyclonal anti-GAPDH (FL-335, #sc-25778, Santa Cruz Biotechnology), rabbit  
8 polyclonal anti-HA-tag (#H6908, Merck), rabbit polyclonal anti-RNF213 (#HPA003347, Merck), mouse  
9 monoclonal anti-RNF213 (clone 5C12; Santa Cruz Biotechnology), mouse monoclonal anti-FLAG-tag  
10 (M2, #F3165, Merck), rabbit polyclonal anti-LC3B (#PA146286, ThermoFisher scientific), rabbit  
11 polyclonal anti-tubulin- $\alpha$  (#ab18251, Abcam), anti-p24 GAG (#ab9071, Abcam), rabbit polyclonal anti-  
12 PLIN1 (#ab3526, Abcam), rabbit anti-PLIN2 (#ab108323, Abcam), rabbit polyclonal anti-Rab18  
13 (#ab119900, Abcam), anti-AUP1 (Zhang et al., 2018), rabbit polyclonal anti-BiP (Abcam ab21685), rabbit  
14 polyclonal anti-Calnexin (Abcam ab10286), rabbit polyclonal anti-ATGL (Cell Signaling Technology  
15 #2138). *Listeria* EF-Tu was immunoblotted with rabbit polyclonal antisera raised against  $\alpha$ -EF-Tu  
16 (Archambaud et al., 2005). Herpes Simplex virus-1 VP5 was immunoblotted with rabbit polyclonal anti-  
17 NC-1 antiserum specific for HSV-1 VP5 (Cohen et al., 1980). Respiratory syncytial virus RSV-G was  
18 immunoblotted with commercially available goat polyclonal anti-RSV serum (#AB1128, Merck).  
19 Coxsackievirus VP1 was immunoblotted with commercially available mouse monoclonal anti-VP1 (3A8,  
20 Mediagnost). Aforementioned primary antibodies were revealed using goat polyclonal anti-mouse-IgG  
21 (IRDye® 800CW, Li-COR), goat polyclonal anti-rabbit-IgG (IRDye® 800CW, Li-COR), goat polyclonal  
22 anti-mouse-IgG (IRDye® 680RD, Li-COR) or goat polyclonal anti-rabbit-IgG (IRDye® 680RD, Li-COR),  
23 except for anti-RSV serum which was revealed with secondary anti-goat (#sc-2020, Santa Cruz  
24 biotechnology). For microscopy, mouse monoclonal anti-ISG15 (3E5, #sc-69701, Santa Cruz  
25 biotechnology) was used and revealed with goat polyclonal anti-mouse IgG secondary Superclonal™  
26 Recombinant Secondary Antibody, Alexa Fluor 647 (#A28181, Thermo Fisher Scientific).

### 27 **Cell culture**

28 Hek293T cells originate from (Lin et al., 2014) while HeLa cells (ATCC® CCL-2™), A549 cells (ATCC®  
29 CCL-185™) THP-1 cells (ATCC® TIB-202™) and primary human CD14+ monocytes (ATCC® PCS-  
30 800-010™) were purchased from ATCC. HEK293T and A549 cells were cultured in DMEM medium  
31 (#31966047, Thermo Fisher Scientific) supplemented with 10% fetal bovine serum (FBS, #10270106,  
32 Thermo Fisher Scientific). HeLa cells were maintained in MEM medium (#M2279, Merck) supplemented  
33 with 10% FBS, 1% glutamax (#35050038, Thermo Fisher Scientific), 1% non-essential amino acids



34 (#11140035, Thermo Fisher Scientific), 1% sodium pyruvate (#11360039, Thermo Fisher Scientific) and  
35 1% hepes (#15630056, Thermo Fisher Scientific). THP-1 cells were maintained in RPMI 1640 medium  
36 (#61870044, Thermo Fisher Scientific) supplemented with 10% FBS and 2 mM L-glutamine (#25030024,  
37 Thermo Fisher Scientific). THP-1 cells were differentiated to macrophages by complementing the media  
38 with 10 ng/ml phorbol 12-myristate 13-acetate (#P8139, Merck) for seven days, followed by rest for 24 h  
39 in medium RPMI 1640 medium supplemented with 10% FBS, 2 mM L-glutamine. Primary human CD14+  
40 monocytes were maintained in Hank's Balanced Salt Solution (HBSS, #14175095, Thermo Fisher  
41 Scientific) supplemented with 10% FBS. HEK293T, HeLa and A549 cells were authenticated by Eurofins.

## 42 **Plasmid transfection**

43 Plasmid transfection was performed with Polyethylenimine (PEI, #23966-1, Polysciences) as transfection  
44 reagent at a ratio PEI/cDNA of 5:1 (w/w). Plasmids were used at a final concentration of 1  $\mu$ g DNA/10<sup>6</sup>  
45 Hek293T cells or 1  $\mu$ g DNA/5x10<sup>5</sup> HeLa cells. For microscopy, HeLa cells were reverse-transfected at the  
46 day of seeding with 17 $\mu$ g of plasmid either coding for eGFP-RNF213 or eGFP-RNF213- $\Delta$ C using 51  $\mu$ L  
47 of Fugene® HD (#E2311, Promega) for a ratio of 1:3 ( $\mu$ g cDNA /  $\mu$ L transfection reagent). HeLa cells  
48 were cultured for 48 h and moved to a 6 wells-plate with coverslip for microscopy. The following plasmid  
49 were used: pMD2.G (VSV-G), pcDNA3-FLAG-VSV-G, pMET7-GAG-EGFP, pMET7-GAG-ISG15GG,  
50 pMET7-GAG-ISG15AA, pMET7-GAG-ISG15-precursor, pGL4.14-3xFLAG-RNF213, pGL4.14-  
51 3xFLAG-RNF213 $\Delta$ C, pGL4.14-3xFLAG-RNF213<sub>R4810K</sub>, pMet7-FLAG-C-domain-RNF213, pRK5-HA-  
52 RNF4, pCMV3-FLAG-HOIP (RNF31), pMET7-Flag-eGFP, pcDNA3.1-HA-ISG15GG, pccDNA3.1-HA-  
53 ISG15AA, pSVsport (Mock plasmid), pcDNA3.1-hUbe1L (E1), pcDNA3.1-Ubch8 (E2) and pTriEx2-  
54 hHERC5 (E3), pDEST-eGFP-RNF213 and pDEST-eGFP-RNF213 $\Delta$ C. The cDNA sequences of all  
55 aforementioned plasmids are available on addgene.org or listed in Table S2.

## 56 **SiRNA transfection**

57 A commercially available siRNA pool was used to knockdown human RNF213 (#M-023324-02, GE  
58 Healthcare Dharmacon) in figure 2, 3, 4 and 5. As control siRNA treatment, a non-targeting scramble  
59 siRNA (#D-001210-01-05, GE Healthcare Dharmacon) was used in the experiments shown in figure 3 and  
60 supplementary figure 6C while a pool of four scrambled siRNAs (#D-001206-13-05, GE Healthcare  
61 Dharmacon) was used in the experiments shown in figure 2, 4 and 5. In all experiments, siRNAs were  
62 transfected with DharmaFECT transfection reagent (#T-2001-02, GE Healthcare Dharmacon) according to  
63 the instructions of the manufacturer. For supplementary fig. 5A, the siRNA D-023324-05 (GE Healthcare  
64 Dharmacon) and Stealth RNAs (#HSS126645, #HSS184009, Thermo Fisher Scientific) were also  
65 transfected in HeLa cells to knockdown RNF213 with DharmaFECT and Lipofectamine 3000 transfection

66 reagent (#L3000008, Thermo Fisher scientific), respectively. For figure 4, a commercially available siRNA  
67 pool was used to knockdown ISG15 (#M-004235-04-005, GE Healthcare Dharmacon). In these  
68 experiments, a reverse siRNA transfection protocol was adopted to knockdown the expression of ISG15  
69 and RNF213 genes in HeLa cells prior to *Listeria* infection. A single siRNA, custom produced by  
70 Dharmacon, was used to knockdown RSV-N expression as described in (Alvarez et al., 2009).  
71 Immunoblotting assays were conducted to confirm reduction of protein expression levels.

## 72 **Generation of knockout cell lines**

73 The RNF213 knockout HeLa cell line was generated by using a CRISPR/Cas9 approach. Target sequences  
74 were selected by CRISPOR ([CRISPOR.org](https://crispor.org), (Concordet and Haeussler, 2018)). Oligonucleotides  
75 (5'CACCGGAGGCAGCCTCTCTCCGCAC and 5'AAACGTGCGGAGAGAGGCTGCCTCC ;  
76 5'CACCGTGCAGCCCCATAGCAGGTG and 5'AAACCACCTGCTATGGGGGCTGCAC) were  
77 synthesized by ID&T (Leuven, Belgium) and cloned into the pSpCas9(BB)-2A-Puro plasmid (pXP459,  
78 Addgene #48139). HeLa cells were co-transfected with the two RNF213-targeting plasmids with  
79 Lipofectamine 3000 (L3000008, Thermo Fisher scientific) as described above. Cells were selected with 2  
80 µg/mL with Puromycin (#P8833, Merck) for 48 h. Cells were diluted and plated in 96-well plate for single  
81 clone selection. The absence of RNF213 protein expression was confirmed by immunoblotting. The ISG15  
82 knockout HeLa cell line was generated as previously described (Kespohl et al., 2020).

## 83 **SDS-PAGE and immunoblotting**

84 Cells were lysed in 2x Laemmli buffer containing 125 mM Tris-HCl pH 6.8, 4% SDS, 20% glycerol,  
85 0,004% Bromophenol blue supplemented with 20 mM DTT. Protein samples were boiled for 5 minutes at  
86 95°C and sonicated prior to SDS-PAGE. Samples were loaded on 4-20% polyacrylamide gradient gels  
87 (#M42015, Genescript), 4–15% Mini-PROTEAN TGX Gels (#4561084, Biorad), 3-8% Criterion XT tris-  
88 acetate gel (#3450130, Biorad) or 4-15% Criterion TGX gel (#5671083, Biorad) according to the guidelines  
89 of the manufacturer. For detection of RNF213, proteins were separated on a 3-8% Criterion XT tris-acetate  
90 gel (Biorad) or 4-15% Criterion TGX gel according to the instructions of the manufacturer. Proteins were  
91 transferred to PVDF membrane (#IPFL00010, Merck) for 3 hours at 60 V with Tris/Boric buffer at 50  
92 mM/50 mM. Membranes were blocked for 1 hour at room temperature (RT) with blocking buffer (#927-  
93 50000, LI-COR) and incubated with primary antibodies overnight at 4 °C diluted to 1:1000 in TBS. The  
94 next day, membranes were washed three times for 15 minutes with TBS-Tween 0.1% (v/v) buffer and  
95 further incubated at RT for 1 h with the appropriate secondary antibody. Membranes were washed twice  
96 with TBS-tween 0.1% (TBS-T) and once with TBS prior to detection. Immunoreactive bands were  
97 visualized on a LI-COR-Odyssey infrared scanner (Li-COR).



## 98 **Lipid droplets isolation and cellular fractionation**

99 THP-1 cells treated or not with IFN-I (100 U/mL; 8-10 h) were washed and scraped in ice-cold hypotonic  
100 disruption buffer containing 20 mM tricine and 250 mM sucrose pH 7.8, 0.2 mM PMSF followed by  
101 homogenization in a chilled glass homogenizer. THP-1 lysates underwent a nitrogen bomb at a pressure of  
102 35 bar for 15 min on ice to complete cellular disruption. Lysates were centrifuged at 3,000 x g for 10 min  
103 at 4°C and the post-nuclear supernatants was loaded at the bottom of 13-mL centrifuge tubes and overlaid  
104 with ice-cold wash buffer containing 20 mM HEPES, 100 mM KCl and 2 mM MgCl<sub>2</sub> at pH 7.4. Tubes  
105 were centrifuged in a swing-out rotor at 182,000 x g at 4°C for 1 h. Lipid droplets were collected from the  
106 top of the gradient. Lipid droplet-enriched samples were centrifuged at 20,000 x g for 5 min at 4°C to  
107 separate the floating lipid droplets from the aqueous fraction. Lipid droplets were washed three times by  
108 adding 200 µL ice-cold wash buffer followed by centrifugation at 20,000 x g for 5 min at 4°C. Lipid droplets  
109 were resuspended in 100 µL 2x Laemmli buffer and further processed for immunoblot analysis as described  
110 above. To isolate the membrane fraction, THP-1 lysates were centrifuged at 3,000 x g for 10 min at 4°C  
111 and the pellet was washed three times by resuspension with 1 mL of ice-cold wash buffer followed by  
112 centrifugation. The insoluble fractions were resuspended in 2x Laemmli buffer and further processed for  
113 immunoblot analysis as described above. To isolate the cytosolic fraction, THP-1 lysates were centrifuged  
114 at 3,000 xg for 10 minutes and 1 mL aliquot was sampled from the middle of the lysate. The 1mL-aliquot  
115 was further centrifuged at 270,000g for 1 h at 4 °C in a microcentrifuge tube using a TLA100.3 rotor. The  
116 supernatants were collected and mixed to a final 2x Laemmli buffer prior further processing for immunoblot  
117 analysis as described above. For cellular fractionation in HeLa cells, cells were grown on 100 cm<sup>2</sup> petri  
118 dishes and either untreated or treated for 24 h with interferon-β at 10 ng/ml (#11343524, Immunotools).  
119 Cells were processed as described in (Weber et al., 2017). Briefly, cells were detached with trypsin, washed  
120 with PBS and lysed in a buffer containing 300 mM sucrose, 5 mM Tris-HCl, 0.1 mM EDTA, pH 7.4 and a  
121 protease inhibitor cocktail (Roche, cOmplete, Mini, EDTA-free tablet) followed by homogenization in a  
122 chilled glass homogenizer. Lysates were centrifuged at 800 x g for 8 min at 4°C followed by separation of  
123 the soluble and membrane fractions by a second centrifugation step at 20,000 x g for 120 min at 4°C. The  
124 membrane-associated fraction was re-dissolved in lysis buffer to a volume equal to the volume of the  
125 soluble fraction. Samples were mixed with Laemmli buffer and processed for immunoblotting as described  
126 above.

## 127 **Glycerol gradient analyses**

128 Lysates prepared as described for the purification of lipid droplets were loaded onto a glycerol gradient  
129 (10%–40% (w/v)). The gradients were centrifuged at 237,000 x g for 20 h at 4°C, using a SW 55 Ti rotor  
130 and Beckman L-80 ultracentrifuge. Twenty fractions for each sample were collected in 2 mm increments  
131 using a BioComp Piston Gradient fractionator. Fractions were concentrated by TCA precipitation and

132 analyzed by immunoblotting as described above. For immunoprecipitations, each gradient fraction was first  
133 desalted over Amicon filter to remove glycerol and resuspended in 1 ml of resuspension buffer containing  
134 20 mM HEPES, 100 mM KCl and 2 mM MgCl<sub>2</sub> at pH 7.4. Resuspended fractions were pre-cleared with  
135 Protein G-agarose beads by incubation for 1 h at 4°C. Immunoprecipitation of Rnf213 was performed from  
136 pre-cleared fractions by incubation with RNF213 antibody for 3 hours at 4°C with end-over-end rotation.  
137 Beads were washed twice in 1 mL of resuspension buffer by centrifugation and samples were eluted into  
138 1X Laemmli buffer by heating at 60°C and processed for immunoblotting as described above.

#### 139 ***In vitro* infection with *Listeria monocytogenes***

140 *Listeria monocytogenes* (EGD BUG600 strain) was grown in brain heart infusion (BHI) medium at 37°C.  
141 *Listeria* were cultured overnight and then sub cultured 1:10 in BHI medium for 2 h at 37°C. Bacteria were  
142 washed three times in PBS and resuspended in medium without FBS prior to infection. HeLa cells were  
143 grown in 6-well plates and infected with *Listeria* at a multiplicity of infection (MOI) of 25. Right after  
144 infection, plates were centrifuged at 1,000 x g for 1 min followed by incubation for 1 hour at 37°C to allow  
145 entry of the bacteria. Afterwards, cells were washed two times with PBS and then grown in MEM medium  
146 with 10% FBS, 1% glutamax, 1% non-essential amino acids, 1% sodium pyruvate, 1% hepes, supplemented  
147 with 40 µg/mL of gentamicin to kill extracellular bacteria. For immunoblotting, infected cells were washed  
148 with ice-cold PBS, lysed in 2x Laemmli buffer and further processed as described above. To count the  
149 number of intracellular bacteria, HeLa cells were washed and lysed with miliQ water to release intracellular  
150 bacteria. Colony Forming Units (CFUs) were determined by serial dilution and plating on BHI agar.

#### 151 ***In vivo* infection with *Listeria monocytogenes***

152 *Listeria monocytogenes* (EGD BUG600 strain) was grown as described above. Female and Male C57BL/6  
153 mice (RNF213<sup>+/+</sup> or RNF213<sup>-/-</sup>) between 8 and 12 weeks of age were infected intravenously by tail vein  
154 injection with  $5 \times 10^5$  bacteria per animal. Mice were sacrificed 72 h following infection. CFUs per organ  
155 (liver or spleen) were enumerated by serial dilutions after tissue dissociation in sterile saline. The animals  
156 were housed in a temperature-controlled environment with 12 h light/dark cycles; food and water were  
157 provided ad libitum. The animal facility operates under the Flemish Government License Number  
158 LA1400536. All experiments were done under conditions specified by law and authorized by the  
159 Institutional Ethical Committee on Experimental Animals (Ethical application EC2019-080).

#### 160 ***In vitro* infection with Herpes Simplex Virus Type 1 strain C12 (HSV-1 C12)**

161 HSV-1 C12 is a recombinant HSV-1 strain SC16 containing a cytomegalovirus (HCMV) IE1  
162 enhancer/promoter-driven enhanced green fluorescent protein (EGFP) expression cassette in the US5 locus  
163 (kindly provided by Stacey Efstathiou (University of Cambridge, Cambridge, UK). HSV-1 C12 was

164 propagated in Vero cells and titrated by plaque assay with Vero cells according to L. Grosche et al., 2019.  
165 HeLa cells were grown in 96-well plates and infected with HSV-1 C12 at MOI 0.1 (figure 4A-C) or MOI  
166 0.05 (figure 4D-E). Cells were treated either without or with 1000 U/mL IFN $\alpha$ 2a (# 11343504,  
167 Immunotools). Cells were maintained in 2% FBS FluoroBrite DMEM Media. GFP fluorescence was  
168 monitored at 24 h intervals using the Infinite® 200 PRO Reader and Tecan iControl Software (Tecan Life  
169 Sciences). Each individual measurement (n=4) was normalized to the mean value of the uninfected wells  
170 (n=4). The relative area under the curve from 0 to 72 h post infection was calculated for each growth curve  
171 according to (Cramer et al., 2018). For immunoblot analysis, cells 24 h p.i were washed with ice-cold PBS,  
172 lysed in 2x Laemmli buffer and further processed as described above.

### 173 ***In vitro* infection with coxsackievirus B3 (CVB3)**

174 CVB3 Nancy strain was propagated in Green Monkey Kidney Cells and quantified by plaque assay in HeLa  
175 cells as described below. HeLa cells were grown in 6-well plates and infected with CVB3 (MOI 0.01) in  
176 serum free medium. After 1 h, the CVB3 inoculum was replaced and HeLa cells were cultured in MEM  
177 medium with 10% FBS, 1% glutamax, 1% non-essential amino acids, 1% sodium pyruvate and 1% hepes.  
178 For immunoblotting, the cells were washed with ice-cold PBS, lysed in 2x Laemmli buffer and further  
179 processed as described above. For relative quantification upon knockdown of RNF213, intensity of the VP1  
180 band was normalized to its intensity in the siScramble condition. For qRT-PCR, cells were lysed in 500  $\mu$ l  
181 TRIzol™ Reagent. RNA was extracted from the aqueous phase after chloroform addition and precipitated  
182 by addition of isopropyl alcohol. 250 ng RNA per sample was used for reverse transcription to cDNA. For  
183 relative quantification, the  $\Delta\Delta$ Ct method was used with Hypoxanthine Phosphoribosyl transferase (HPRT)  
184 as housekeeping gene. Plaque forming units (PFU)/mL were determined by serial dilution on confluent  
185 HeLa cells.

### 186 ***In vitro* infection with respiratory syncytial virus (RSV)**

187 RSV-A2, an A subtype of RSV (ATCC, VR-1540, Rockville), was propagated in HEp-2 cells and  
188 quantified by plaque assay with A549 cells as described below. A549 cells were grown in 6-well, 48-well  
189 or 96-well plates respectively for immunoblot, titration or plaque assay. A549 cells were infected in serum-  
190 free medium with RSV-A2 at MOI 0.001, MOI 0.02 or MOI 0.005 for the respective experiment. After 4  
191 h, the RSV inoculum was replaced and A549 cells were cultured in DMEM medium with 10% FBS. For  
192 immunoblot analysis, cells were washed with ice-cold PBS, lysed in 2x Laemmli buffer and further  
193 processed as described above. In the plaque and titration assay, A549 cells were treated either without or  
194 with 10 ng/mL interferon- $\beta$  (#11343524, Immunotools) for 48 h. For plaque assays, the DMEM medium  
195 with 10% FBS was supplemented with 0,6% (w:v) avicel RC-851 (FMC biopolymers) and the cells were  
196 fixed 6 days post RSV infection with 4% paraformaldehyde (PFA) in PBS and permeabilized with 0,2%

197 Triton-X100 in PBS. RSV plaques were stained with a polyclonal goat anti-RSV serum and secondary anti-  
198 goat IgG. Plaques were visualized by TrueBlue™ Peroxidase substrate (5510, Sera Care). Each plaque was  
199 quantified in Fiji. In titration assays, Plaque Forming Units (PFU)/mL were determined by serial dilution  
200 on confluent A549 cells. Supernatants were collected and mixed (1:1) with a 40% sucrose solution in HBSS,  
201 snap frozen and stored at -80°C.

## 202 **BMDM's**

203 Female and Male C57BL/6 mice (RNF213<sup>+/+</sup> or RNF213<sup>-/-</sup>) between 8 and 12 weeks of age were used  
204 to isolate bone marrow cells from femurs. Isolated bone marrow cells were cultured for 7 days at a density  
205 of 10<sup>5</sup> cells/mL in DMEM/F-12 medium, supplemented with 10% FBS, 10 units/ml penicillin, 10 µg/mL  
206 streptomycin, and 20 ng/mL murine M-CSF at 37°C in a humidified atmosphere with 5% CO<sub>2</sub>. On day 3,  
207 fresh medium containing 40 ng/ml M-CSF was added. Cells were further differentiated for 4 days in M-  
208 CSF containing medium.

## 209 **Microscopy and image processing**

210 HeLa cells were plated on coverslips the day prior to an experiment. Cells were either not treated or infected  
211 as described above with *Listeria monocytogenes* strain EGD or infected with the same strain stably  
212 expressing mCherry for either 24 hours at MOI 25 or for 18 h at MOI 5, respectively. Cells were washed  
213 with PBS and subsequently fixed with 4% PFA (Electron Microscopy Sciences, Hatfield, Pennsylvania) in  
214 PBS for 20 minutes at room temperature, then permeabilized with 0.5% Triton in PBS. Only for the figure  
215 6A and supplementary figure 9B, cells were then counterstained for lipid droplets (HCS LipidTOX™ Red  
216 Neutral Lipid Stain, Thermo Fisher Scientific). Coverslips were mounted using DAPI Fluoromount-G®  
217 (SouthernBiotech, USA), and images were acquired using an inverted wide-field fluorescence microscope  
218 (Axio Observer 7, Carl Zeiss Microscopy, Germany) equipped with an Axiocam 506 mono camera and the  
219 software ZEN 2.3 Pro. Images were deconvoluted using Zen 3.1 (Blue Edition) for optimal resolution. For  
220 figure 6B, the analysis of the number of lipid droplet per cell and the colocalization of eGFP-RNF213 with  
221 *Listeria* was performed using Fiji (ImageJ) software. For supplementary figure 9B-C, BMDMs used for  
222 microscopy were seeded in IBIDI µ-Slide 8 Well chambers and treated with oleic acid conjugated to BSA  
223 (molar ratio 5:1 in PBS) at a concentration of 200µM. Interferon-β was used at 10 ng/mL. BMDMs were  
224 fixed in PBS with 4% PFA for 20 min at RT. LHCS LipidTOX™ Red Neutral Lipid Stain, Thermo Fisher  
225 Scientific) and Hoechst were used to visualize lipid droplets and nuclei respectively. Cells were mounted  
226 using Prolong Diamont Mounting Medium (Thermo, USA). Images were acquired using a confocal laser  
227 scanning microscope (LSM880 with Airyscan, Carl Zeiss Microscopy, Germany) and the software ZEN  
228 2.3 Pro. And deconvoluted using Zen 3.1 (Blue Edition) for optimal resolution. The number and relative  
229 area of LDs were analyzed using Volocity software.

### 230 **Virotrap sample preparation for LC-MS/MS and immunoblotting analysis**

231 Virotrap experiments were performed as described in (Titeca et al., 2017). Briefly, the day before  
232 transfection  $10^6$  Hek293T cells (authenticated) were seeded in four T75 flasks for each condition. Cells  
233 were then transfected with four different bait proteins, each fused via their N-terminus to HIV-1 GAG:  
234 mature ISG15 (ending on -LRLRGG), mature non-conjugatable ISG15 (ending on -LRLRAA), full length  
235 ISG15 precursor, and eDHFR (dihydrofolate reductase from *Escherichia coli*) as control. VSV-G and  
236 FLAG-VSV-G were co-transfected to allow single-step purification of the produced particles. The day after  
237 transfection, these cells were treated with interferon- $\alpha$  for 24 h (10 ng/mL; #11343596, Immunotools)  
238 during the particle production phase. Supernatant was harvested 40 h after transfection followed by  
239 centrifugation and filtration (0.45  $\mu$ M; SLHV033RS, Merck Millipore) to remove cellular debris. Virotrap  
240 particles containing protein complexes were purified in a single step using biotinylated anti-FLAG BioM2  
241 antibody (#F9291, Merck) and Dynabeads MyOne Streptavidin T1 Beads (#65601, ThermoFisher  
242 scientific), and were consecutively eluted by competition using FLAG peptide (#F3290, Merck). For  
243 immunoblot analysis, samples containing the purified VLPs were mixed 1:1 with 4X Laemmli buffer buffer  
244 complemented with 20mM DTT further analyzed as described above. After FLAG elution, samples were  
245 processed with Amphipols A8-35 (#A835, Anatrace), digested using trypsin (V5111, Promega), and  
246 acidified. Each condition (4 baits, +/- interferon- $\alpha$ ) was analyzed in quadruplicate, leading to a total of 32  
247 samples for LC-MS/MS analysis. Peptides were purified on Omix C18 tips (Agilent), dried and re-dissolved  
248 in 20  $\mu$ l loading solvent A (0.1% trifluoroacetic acid in water/acetonitrile (ACN) (98:2, v/v)) of which 2.5  
249  $\mu$ l was injected for LC-MS/MS analysis.

### 250 **GST pull down for LC-MS/MS and immunoblotting**

251 HEK293T, HeLa or differentiated THP-1 cells were grown at ~80-90% confluence in 15 cm culture dishes  
252 (1 petri dish/sample). HEK293T cells were treated with interferon- $\alpha$  while HeLa and THP-1 cells were  
253 treated with interferon- $\beta$ , at 10 ng/mL for 24 h (#11343596, #11343524, Immunotools). Each condition (2  
254 baits, 3 cell lines) was analyzed in triplicate, leading to a total of 18 samples for LC-MS/MS analysis. Cells  
255 were washed three times with PBS with  $\text{Ca}^{2+}$  and  $\text{Mg}^{2+}$  and scraped in 1 mL lysis buffer containing 50 mM  
256 Tris.HCl (pH 8.0), 150mM NaCl, 1% triton-x-100 (v/v), 1 mM PMSF and a protease inhibitor cocktail  
257 (Roche, cOmplete, Mini, EDTA-free tablet, 4693159001). Samples were incubated 60 minutes on ice or 20  
258 minutes under end-over-end agitation at 4°C. Lysates were cleared by centrifugation for 15 minutes at  
259 16,000 x g at 4°C to remove insoluble components. 15  $\mu$ L magnetic glutathione beads (Pierce ThermoFisher  
260 scientific) were incubated with 4  $\mu$ g of purified GST-tagged ISG15 (R&D systems, UL-600-500) or GSTP1  
261 (#G5663, Merck) under agitation. For immunoblotting, glutathione beads were also decorated with GST-  
262 tagged-SUMO1 (R&D systems, UL-710-500) or GST-tagged-Ubiquitin (R&D systems, U-540-01M).



263 Incubation was performed overnight at 4°C in 500 µL 50 mM Tris.HCl, 150 mM NaCl, 1% triton-x-100  
264 (v/v), 1 mM DTT after which decorated glutathione beads were blocked by addition of BSA to a final  
265 concentration of 2% (w/v) and incubation for an additional hour at 4°C. Then, the cleared lysates were  
266 incubated overnight at 4°C with the decorated glutathione beads under agitation to allow binding of proteins  
267 to ISG15. The following day, the beads were precipitated with a magnetic stand, washed once with 1mL  
268 wash buffer containing 50 mM Tris.HCl (pH 8.0), 150mM NaCl, 1% triton-x-100 (v/v). For  
269 immunoblotting, the beads were washed two extra times with 1mL wash buffer for a total of three washes.  
270 Beads were mixed with 60µL 2X Laemmli buffer complemented with 20mM DTT and boiled at 95°C for  
271 10 minutes. Beads were precipitated with a magnet and the supernatants were further analyzed by  
272 immunoblotting as described above. In the LC-MS/MS analysis, beads were washed three extra times with  
273 1 mL trypsin digestion buffer containing 20 mM Tris HCl pH 8.0, 2 mM CaCl<sub>2</sub>. Washed beads were re-  
274 suspended in 150 µl digestion buffer and incubated for 4 hours with 1 µg trypsin (Promega) at 37 °C. Beads  
275 were removed, another 1 µg of trypsin was added and proteins were further digested overnight at 37 °C.  
276 Peptides were purified on Omix C18 tips (Agilent), dried and re-dissolved in 20 µl loading solvent A (0.1%  
277 trifluoroacetic acid in water/acetonitrile (ACN) (98:2, v/v)) injected for LC-MS/MS analysis. In the  
278 experiment with HeLa cells, 15 µL of samples was injected while 5µL was injected for the experiment with  
279 THP-1 and Hek293T cells.

### 280 **Immunoprecipitation (IP) for LC-MS/MS and immunoblotting**

281 HEK293T and HeLa cells were grown at ~80-90% confluence in 15 cm culture dishes (1 petri dish/sample).  
282 In the IP-immunoblotting experiments, cells were transfected either with FLAG-tagged-eGFP or FLAG-  
283 RNF213 plasmids, plus, the ISG15 conjugation machinery with HA-tagged-ISG15 matured, UBA7,  
284 UBCH8 and HERC5 plasmids. In the IP-MS experiment, cells were transfected either with plasmid coding  
285 for HA-tagged-ISG15AA or a mock plasmid. HEK293T cells were treated with interferon- $\alpha$  at 24h or 48h  
286 while HeLa cells were treated with interferon- $\beta$  at 24h. Interferon- $\alpha/\beta$  treatment were performed at 10  
287 ng/mL (#11343596, #11343524, Immunotools). Each condition (2 baits, 3 types of interferon treated cells)  
288 was analyzed in triplicate, leading to a total of 18 samples for LC-MS/MS analysis. Cells were washed  
289 three times with PBS with Ca<sup>2+</sup> and Mg<sup>2+</sup> and scraped in 1.5 mL lysis buffer containing 50 mM Tris.HCl  
290 (pH 8.0), 150mM NaCl, 1% triton-x-100 (v/v), 1 mM PMSF and a protease inhibitor cocktail (Roche,  
291 cOmplete, Mini, EDTA-free tablet, 4693159001). Samples were incubated 60 minutes on ice or 20 minutes  
292 under end-over-end agitation at 4°C. Lysates were cleared by centrifugation for 15 minutes at 16,000 x g  
293 at 4°C to remove insoluble components. Supernatants were incubated with Pierce anti-HA magnetic beads  
294 (#88836, Pierce ThermoFisher scientific) or anti-FLAG magnetic beads (#M8823, Merck). Lysates were  
295 incubated at 4°C under agitation overnight. The beads were precipitated with a magnetic stand and

296 subsequently washed once with wash buffer containing 50mM Tris.HCl (pH 8.0), 150mM NaCl, 1% triton-  
297 x-100 (v/v). In the IP-immunoblotting experiments, the beads were washed two extra times with wash  
298 buffer. Beads were mixed with 60 $\mu$ L 2X Laemmli buffer and heated at 60°C for 10 minutes. Beads were  
299 precipitated with a magnet and the supernatants were further analyzed by immunoblot analysis as described  
300 above. In the IP-MS experiment, the beads were washed three extra times with trypsin buffer containing:  
301 20 mM Tris HCl pH 8.0, 2 mM CaCl<sub>2</sub>. The proteins were on-bead digested with 1  $\mu$ g trypsin (Promega) for  
302 4 hours at 37 °C under agitation. Then, the beads were precipitated and the supernatants were mixed with  
303 1 $\mu$ g of trypsin and further digested overnight at 37°C under agitation. Peptides were desalted on reversed  
304 phase C18 OMIX tips (Agilent), all according to the manufacturer's protocol. Purified peptides were dried,  
305 re-dissolved in 20  $\mu$ l loading solvent A (0.1% trifluoroacetic acid in water/acetonitrile (ACN) (98:2, v/v))  
306 and 5  $\mu$ L were injected for LC-MS/MS analysis.

### 307 **LC-MS/MS and data analysis**

308 LC-MS/MS analysis was performed on an Ultimate 3000 RSLCnano system (ThermoFisher scientific) in  
309 line connected to a Q Exactive mass spectrometer or a Q Exactive HF (ThermoFisher scientific). Trapping  
310 was performed at 10  $\mu$ l/min for 4 min in loading solvent A on a 20 mm trapping column (100  $\mu$ m internal  
311 diameter (I.D.), 5  $\mu$ m beads, C18 Reprosil-HD, Dr. Maisch, Germany) before the peptides were separated  
312 on a 150 mm analytical column packed in the needle (75  $\mu$ m I.D., 1.9  $\mu$ m beads, C18 Reprosil-HD, Dr.  
313 Maisch). Prior to packing of the column, the fused silica capillary had been equipped with a laser pulled  
314 electrospray tip using a P-2000 Laser Based Micropipette Peller (Sutter Instruments). Alternatively,  
315 peptides were separated on a 500 mm long micro pillar array column ( $\mu$ PAC™, PharmaFluidics) with C18-  
316 endcapped functionality. This column consists of 300  $\mu$ m wide channels that are filled with 5  $\mu$ m porous-  
317 shell pillars at an inter pillar distance of 2.5  $\mu$ m. With a depth of 20  $\mu$ m, this column has a cross section  
318 equivalent to an 85  $\mu$ m inner diameter capillary column. Peptides were eluted from the analytical column  
319 by a non-linear gradient from 2 to 55% solvent B (0.1% FA in water/acetonitrile (2:8, v/v)) over 30, 60 or  
320 90 minutes at a constant flow rate of 250 or 300 nL/min, followed by a 5 min in 99% solvent B. Then,  
321 peptides were eluted by a 5 min in 99% solvent B. The column was then re-equilibrated with 98% solvent  
322 A (0.1% FA in water) for 15 min. In the virotrap experiment, the mass spectrometer was operated in positive  
323 and data-dependent mode, automatically switching between MS and MS/MS acquisition for the 5, 10 or 12  
324 most abundant ion peaks per MS spectrum. Full-scan MS spectra (400-2,000 m/z) were acquired at a  
325 resolution of 70,000 (at 200 m/z) in the orbitrap analyzer after accumulation to a target value of 3E6 for a  
326 maximum of 80 ms. The 10 most intense ions above a threshold value of 1.7E4 were isolated in the trap  
327 with an isolation window of 2 Da for maximum 60 ms to a target AGC value of 5E4. Precursor ions with  
328 an unassigned, or with a charge state equal to 1, 5-8, or >8 were excluded. Peptide match was set on

329 “preferred” and isotopes were excluded. Dynamic exclusion time was set to 50 s. Fragmentation were  
330 performed at a normalized collision energy of 25%. MS/MS spectra were acquired at fixed first mass 140  
331 m/z at a resolution of 17,500 (at 200 m/z) in the Orbitrap analyzer. MS/MS spectrum data type was set to  
332 centroid. The polydimethylcyclsiloxane background ion at 445.12002 was used for internal calibration  
333 (lock mass) in addition to the ion at 361.14660 corresponding to a tri-peptide of asparagine that was spike-  
334 in the MS solvents as described in (Staes et al., 2013). Similar settings were used for the GST pull down  
335 and immunoprecipitation experiments.

336 Data analysis was performed with MaxQuant (version 1.6.3.4) using the Andromeda search engine with  
337 default search settings including a false discovery rate set at 1% on the PSM, peptide and protein level. All  
338 spectral data files were searched with MaxQuant against all human proteins in the Uniprot/Swiss-Prot  
339 database (database release version of January 2019 containing 20,413 protein sequences (taxonomy ID  
340 9606), downloaded from [www.uniprot.org](http://www.uniprot.org)). For virotrap, the 32 recorded spectral data files were searched  
341 together and the search database was complemented with the GAG, VSV-G, and eDHFR protein sequences.  
342 For the GST pull down experiments, three different searches were performed, one search for each cell line.  
343 For the IP experiments, three different searches were performed, two searches for HEK293T cells treated  
344 with interferon- $\alpha$  for 24h and 48h, and one search for HeLa cells treated with interferon- $\beta$  for 24h. For GST  
345 pulldown and IP experiment, each search comprised six spectral data files. The mass tolerance for precursor  
346 and fragment ions was set to 4.5 ppm and 20 ppm, respectively, during the main search. Enzyme specificity  
347 was set as C-terminal to arginine and lysine (trypsin), also allowing cleavage at arginine/lysine-proline  
348 bonds with a maximum of two missed cleavages. Variable modifications were set to oxidation of  
349 methionine (sulfoxides) and acetylation of protein N-termini. Matching between runs was enabled with an  
350 alignment time window of 20 minutes and a matching time window of 1 minute. Only proteins with at least  
351 one peptide were retained to compile a list of identified proteins. In virotrap, 1,214 proteins were identified  
352 in all 32 samples. In the GST pulldown, 599 proteins were identified in the experiment with THP-1 cells,  
353 800 with HeLa cells and 933 with HEK293T cells. In the IP experiments, 401 proteins were identified in  
354 the experiment with HEK293T cells treated with interferon- $\alpha$  for 24h; 3,795 proteins were identified in the  
355 experiment with HEK293T cells treated with interferon- $\alpha$  for 48h; 1,419 proteins were identified in the  
356 experiment with HeLa cells treated with interferon- $\beta$  for 24h. Proteins were quantified by the MaxLFQ  
357 algorithm integrated in the MaxQuant software. A minimum of two ratio counts from at least one unique  
358 peptide was required for quantification. Further data analysis was performed with the Perseus software  
359 (version 1.6.2.3) after loading the proteinGroups table from MaxQuant. Hits identified in the reverse  
360 database, only identified by modification site and contaminants were removed and protein LFQ intensities  
361 were log<sub>2</sub> transformed. Replicate samples were grouped, proteins with less than three or four valid values  
362 in at least one group were removed and missing values were imputed from a normal distribution around the

363 detection limit to compile a list of quantified proteins. In the virotrap experiment, 613 proteins were  
364 quantified. In the GST pull down experiments, 595 quantified proteins in the experiment with THP-1 cells,  
365 415 with HeLa cells and 933 with Hek293T cells. In the IP experiments, 223 proteins were quantified in  
366 the experiment with HEK293T cells treated with interferon- $\alpha$  for 24h; 2,362 proteins were quantified in the  
367 experiment with HEK293T cells treated with interferon- $\alpha$  for 48h; 547 proteins were quantified in the  
368 experiment with HeLa cells treated with interferon- $\beta$  for 24h. On the quantified proteins, for each ISG15  
369 bait a t-test was performed for a pairwise comparison with the control condition to reveal specific ISG15  
370 interaction partners. The results of these t-tests are shown in the volcano plot in Fig. 1 and Supplementary  
371 Fig. 1-3. For each protein, the log<sub>2</sub> (ISG15/control) fold change value is indicated on the X-axis, while the  
372 statistical significance (-log p value) is indicated on the Y-axis (Table S1). Proteins outside the curved lines,  
373 set by an FDR value of 0.001 and an S0 value of 2 in the Perseus software, represent specific ISG15  
374 interaction partners. The mass spectrometry proteomics data for the virotrap and the GST pulldown  
375 experiments have been deposited to the ProteomeXchange Consortium via the PRIDE partner repository  
376 with the dataset identifiers PXD018345 and PXD018346.

377

### 378 **Generation of RNF213 knockout mice**

379 B6J-RNF213em1Irc mice were generated using the CRISPR/Cas9 system. Synthetic Alt-R® CRISPR-  
380 Cas9 crRNA (Integrated DNA Technologies) with protospacer sequences 5'  
381 CAGAGCTTCGGAACCTTTGCT 3' and 5' TGTGCCCTCATCAACCGTC 3' were duplexed with  
382 synthetic Alt-R® CRISPR-Cas9 tracrRNA (Integrated DNA Technologies). cr/tracrRNA duplexes (100  
383 ng/ $\mu$ l) were complexed with Alt-R® S.p. Cas9 Nuclease V3 (500 ng/ $\mu$ l) (Integrated DNA Technologies).  
384 The resulting RNP complex was electroporated into C57BL/6J zygotes using a Nepa21 electroporator with  
385 electrode CUY501P1-1.5 using following electroporation parameters: poring pulse = 40V; length 3.5 ms;  
386 interval 50 ms; No. 4; D. rate 10%; polarity + and transfer pulse = 5V; length 50 ms; interval 50 ms; No. 5;  
387 D. rate 40%; polarity +/- . Electroporated embryos were incubated overnight in Embryomax KSOM medium  
388 (Merck, Millipore) in a CO<sub>2</sub> incubator. The following day, 2-cell embryos were transferred to  
389 pseudopregnant B6CBAF1 foster mothers. The resulting pups were screened by PCR over the target region  
390 using primers 5' AGTTTCTTGATCTCTTCCCC 3' and 5' CTCCTCCGTCAGATCCCTA 3'. PCR bands  
391 were Sanger sequenced to identify the exact nature of the deletion. Mouse line B6J-RNF213em1Irc  
392 contains an allele with a deletion of 2854 bp (chr11+: 119440493-119443346) in exon  
393 ENSMUSE00000645741 resulting in a frameshift and premature stopcodons (Supplementary Fig. 5).

394

395

396 **METHODS REFERENCES**

- 397 Alvarez, R., Elbashir, S., Borland, T., Toudjarska, I., Hadwiger, P., John, M., Roehl, I., Morskaya, S.S.,  
398 Martinello, R., Kahn, J., *et al.* (2009). RNA interference-mediated silencing of the respiratory syncytial  
399 virus nucleocapsid defines a potent antiviral strategy. *Antimicrob Agents Chemother* 53, 3952-3962.
- 400 Archambaud, C., Gouin, E., Pizarro-Cerda, J., Cossart, P., and Dussurget, O. (2005). Translation elongation  
401 factor EF-Tu is a target for Stp, a serine-threonine phosphatase involved in virulence of *Listeria*  
402 *monocytogenes*. *Molecular microbiology* 56, 383-396.
- 403 Cohen, G.H., Ponce de Leon, M., Diggelmann, H., Lawrence, W.C., Vernon, S.K., and Eisenberg, R.J. (1980).  
404 Structural analysis of the capsid polypeptides of herpes simplex virus types 1 and 2. *J Virol* 34, 521-531.
- 405 Concordet, J.P., and Haeussler, M. (2018). CRISPOR: intuitive guide selection for CRISPR/Cas9 genome  
406 editing experiments and screens. *Nucleic Acids Res* 46, W242-W245.
- 407 Cramer, M., Bauer, M., Caduff, N., Walker, R., Steiner, F., Franzoso, F.D., Gujer, C., Boucke, K., Kucera, T.,  
408 Zbinden, A., *et al.* (2018). MxB is an interferon-induced restriction factor of human herpesviruses. *Nat*  
409 *Commun* 9, 1980.
- 410 Kespohl, M., Bredow, C., Klingel, K., Voss, M., Paeschke, A., Zickler, M., Poller, W., Kaya, Z., Eckstein, J.,  
411 Fechner, H., *et al.* (2020). Protein modification with ISG15 blocks coxsackievirus pathology by antiviral  
412 and metabolic reprogramming. *Sci Adv* 6, eaay1109.
- 413 Grosche, L., Döhner, K., Düthorn, A., Hickford-Martinez, A., Steinkasserer, A., and Sodeik, B. (2019) Herpes  
414 Simplex Virus Type 1 Propagation, Titration and Single-step Growth Curves. *Bio-protocol* e3441–e3441.
- 415 Lin, Y.C., Boone, M., Meuris, L., Lemmens, I., Van Roy, N., Soete, A., Reumers, J., Moisse, M., Plaisance, S.,  
416 Drmanac, R., *et al.* (2014). Genome dynamics of the human embryonic kidney 293 lineage in response  
417 to cell biology manipulations. *Nat Commun* 5, 4767.
- 418 Staes, A., Vandenbussche, J., Demol, H., Goethals, M., Yilmaz, S., Hulstaert, N., Degroeve, S., Kelchtermans,  
419 P., Martens, L., and Gevaert, K. (2013). Asn3, a reliable, robust, and universal lock mass for improved  
420 accuracy in LC-MS and LC-MS/MS. *Analytical chemistry* 85, 11054-11060.
- 421 Titeca, K., Van Quickenberghe, E., Samyn, N., De Sutter, D., Verhee, A., Gevaert, K., Tavernier, J., and  
422 Eyckerman, S. (2017). Analyzing trapped protein complexes by Virotrap and SFINX. *Nature protocols*  
423 12, 881-898.
- 424 Weber, P., Batoulis, H., Rink, K.M., Dahlhoff, S., Pinkwart, K., Sollner, T.H., and Lang, T. (2017). Electrostatic  
425 anchoring precedes stable membrane attachment of SNAP25/SNAP23 to the plasma membrane. *Elife*  
426 6.
- 427 Zhang, J., Lan, Y., Li, M.Y., Lamers, M.M., Fusade-Boyer, M., Klemm, E., Thiele, C., Ashour, J., and Sanyal,  
428 S. (2018). Flaviviruses Exploit the Lipid Droplet Protein AUP1 to Trigger Lipophagy and Drive Virus  
429 Production. *Cell Host Microbe* 23, 819-831 e815.

430

431



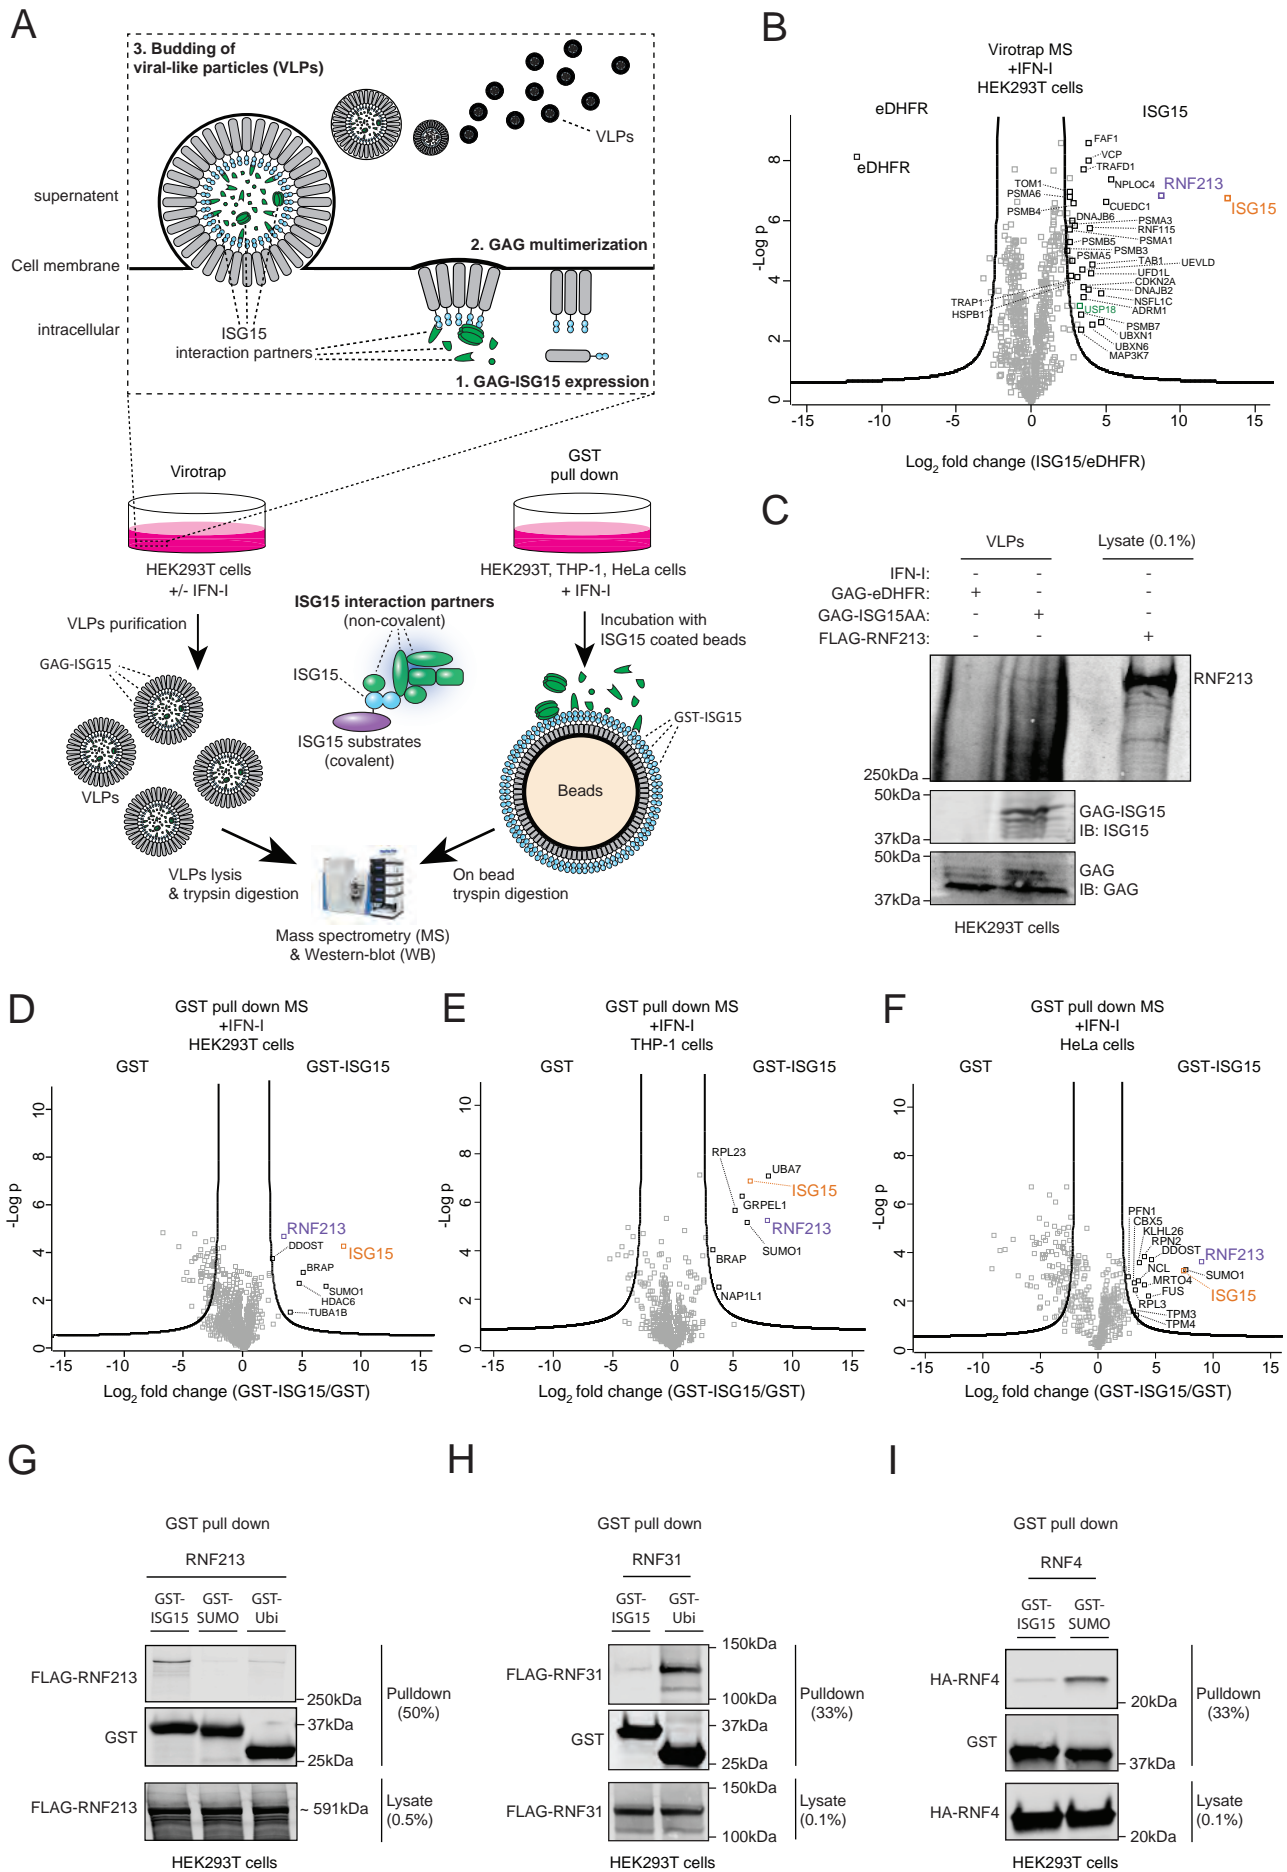

# Figure 2

bioRxiv preprint doi: <https://doi.org/10.1101/2021.06.03.446796>; this version posted June 3, 2021. The copyright holder for this preprint (which was not certified by peer review) is the author/funder, who has granted bioRxiv a license to display the preprint in perpetuity. It is made available under a [CC-BY-NC-ND 4.0 International license](https://creativecommons.org/licenses/by-nc-nd/4.0/).

**A**

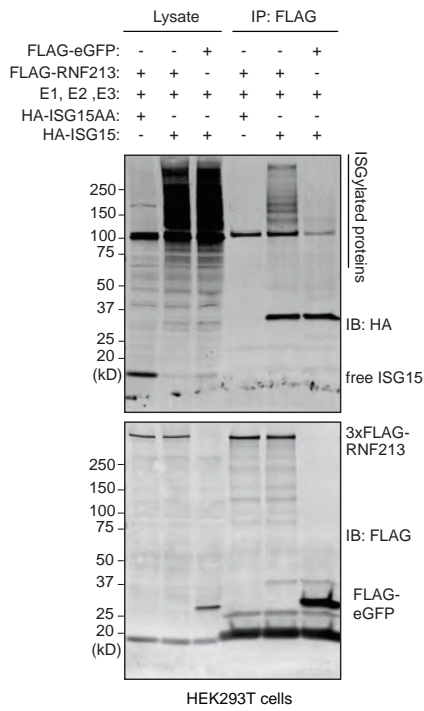

**B**

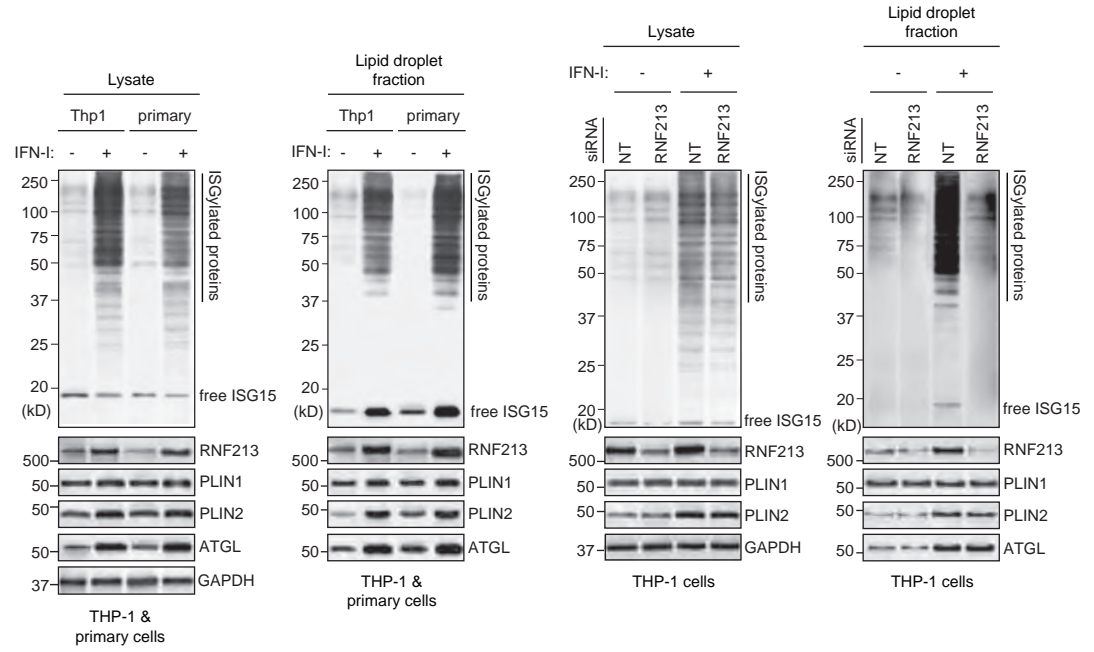

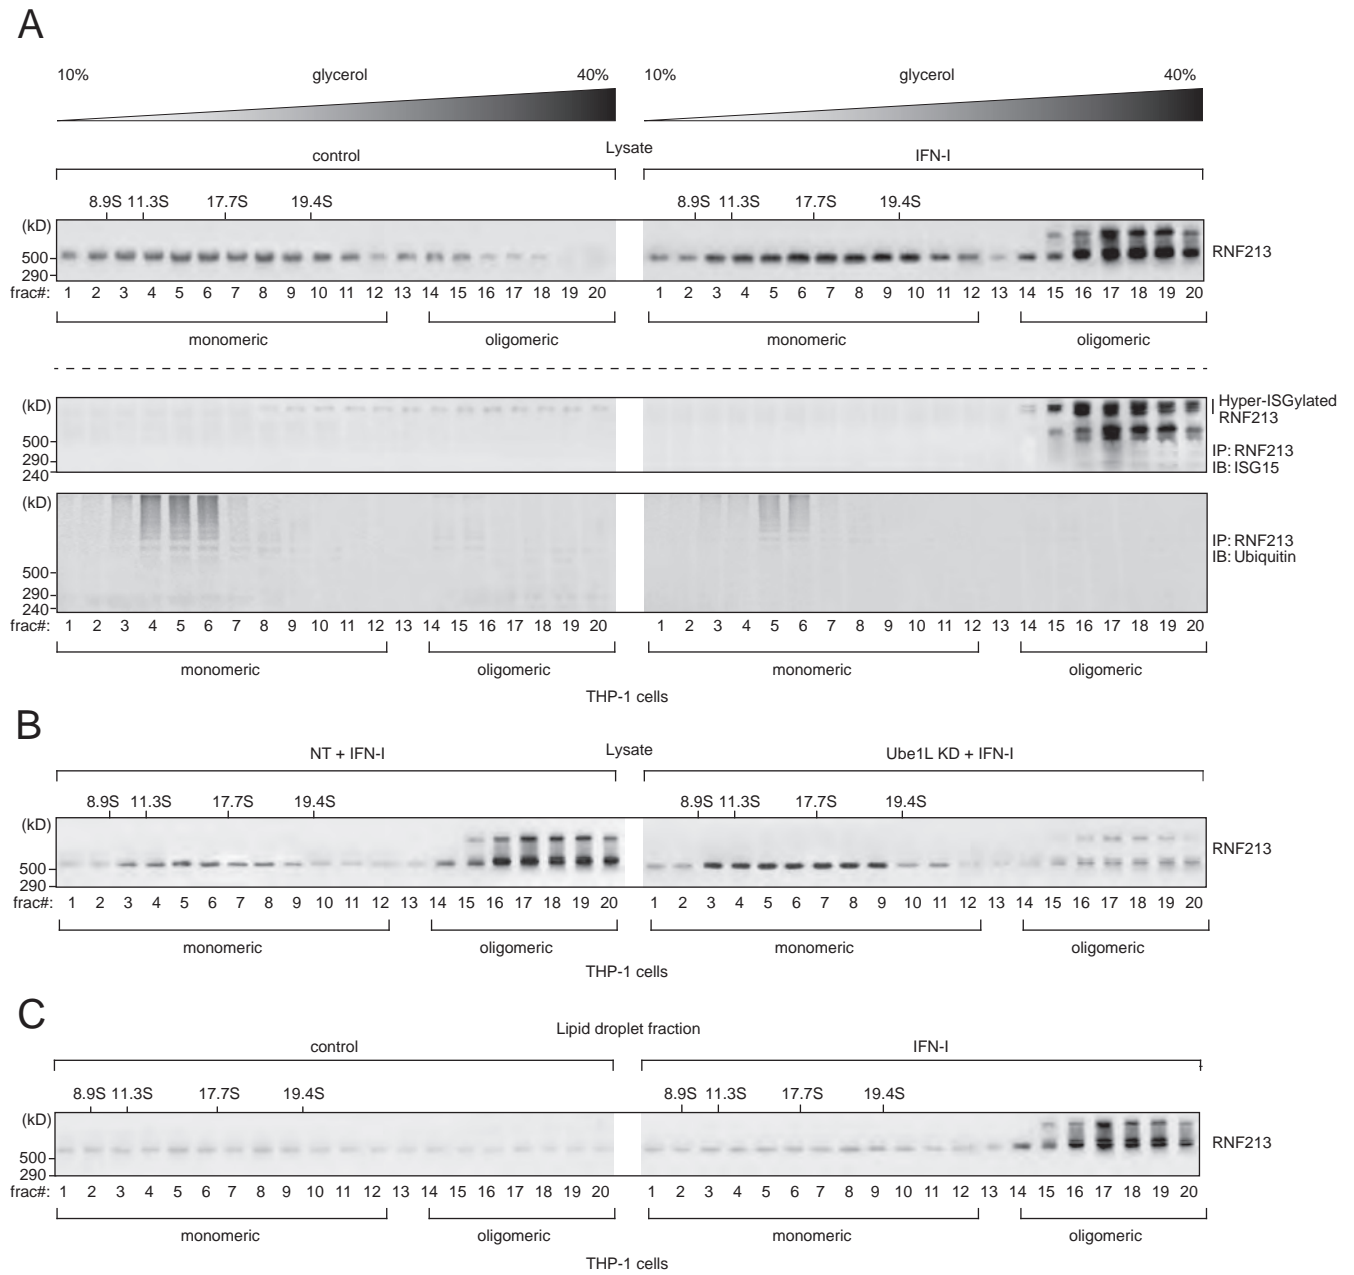

# Figure 4

bioRxiv preprint doi: <https://doi.org/10.1101/2021.06.03.446796>; this version posted June 3, 2021. The copyright holder for this preprint (which was not certified by peer review) is the author/funder, who has granted bioRxiv a license to display the preprint in perpetuity. It is made available under a [CC-BY-NC-ND 4.0 International license](https://creativecommons.org/licenses/by-nc-nd/4.0/).

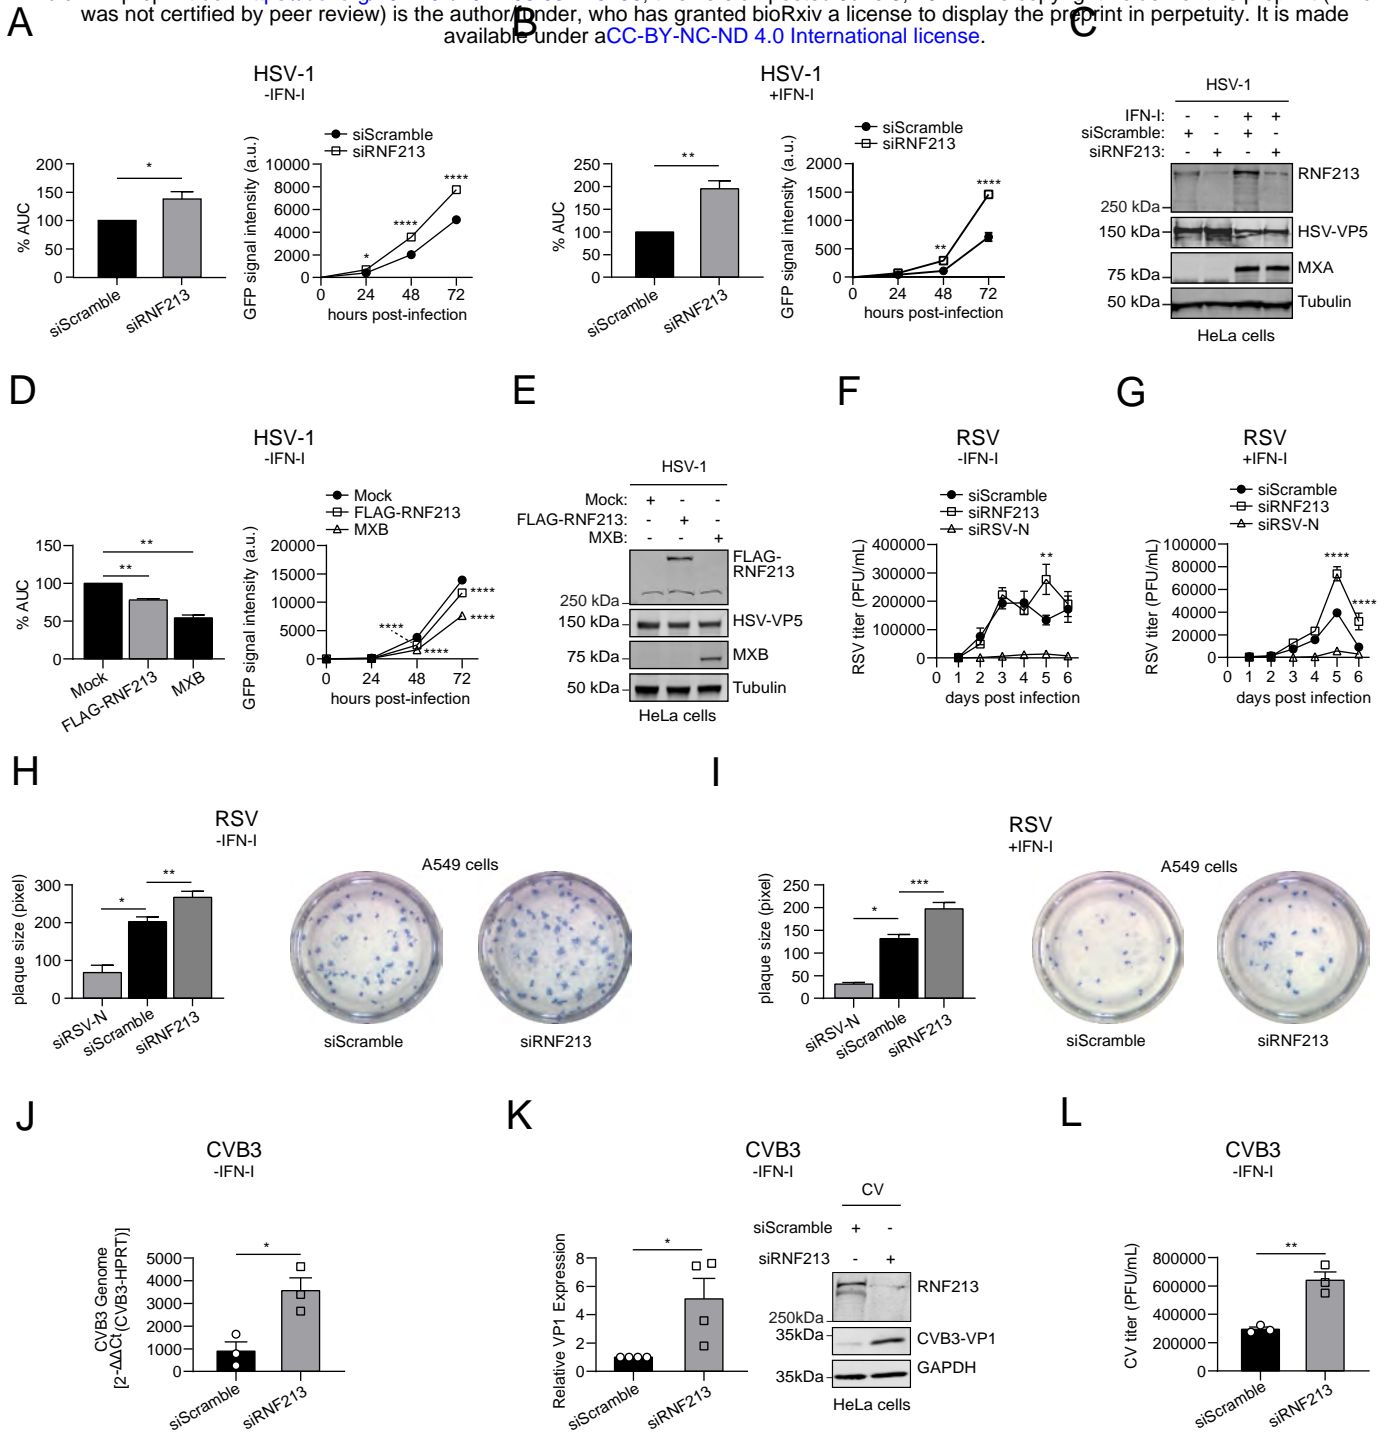

# Figure 5

bioRxiv preprint doi: <https://doi.org/10.1101/2021.06.03.446796>; this version posted June 3, 2021. The copyright holder for this preprint (which was not certified by peer review) is the author/funder, who has granted bioRxiv a license to display the preprint in perpetuity. It is made available under a [CC-BY-NC-ND 4.0 International license](#).

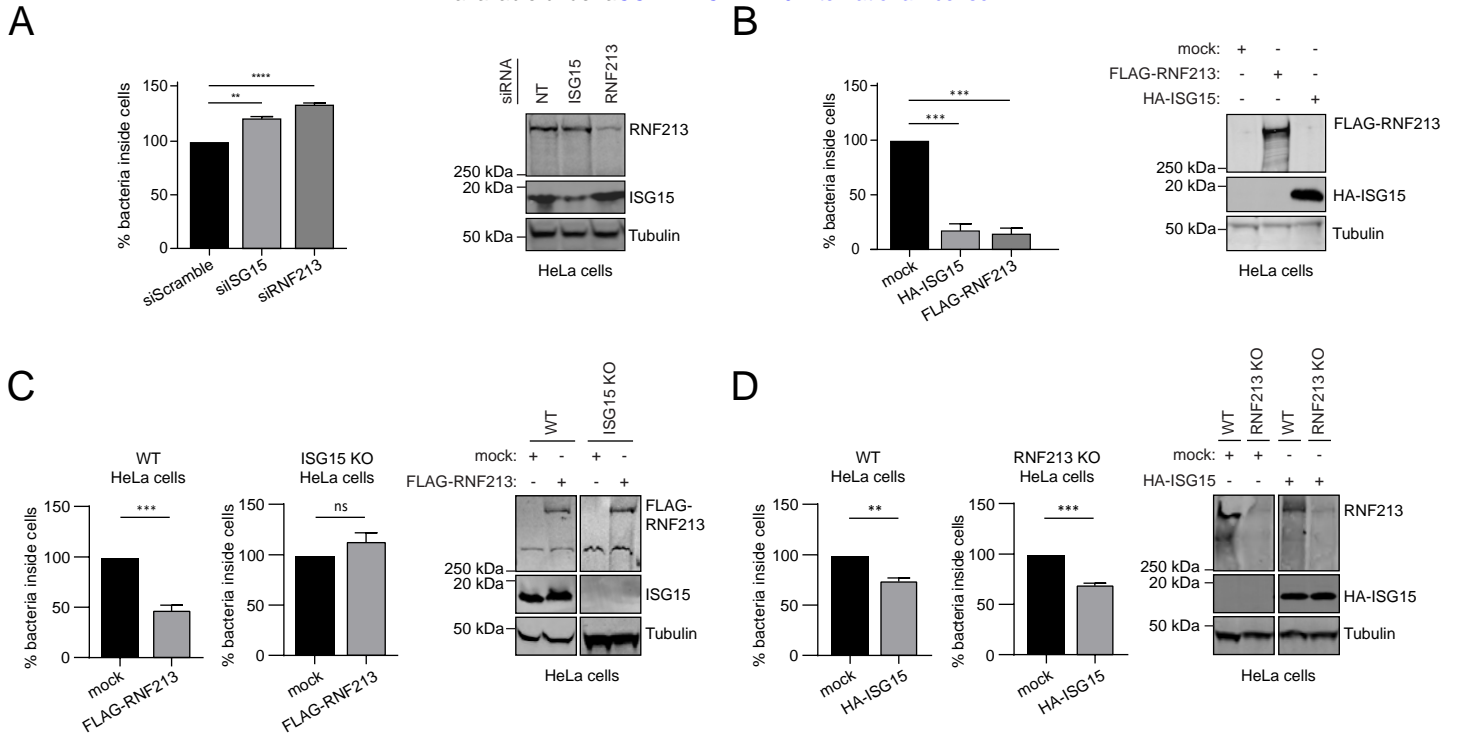



# Figure 6

bioRxiv preprint doi: <https://doi.org/10.1101/2021.06.03.446796>; this version posted June 3, 2021. The copyright holder for this preprint (which was not certified by peer review) is the author/funder, who has granted bioRxiv a license to display the preprint in perpetuity. It is made available under a [CC-BY-NC-ND 4.0 International license](https://creativecommons.org/licenses/by-nc-nd/4.0/).

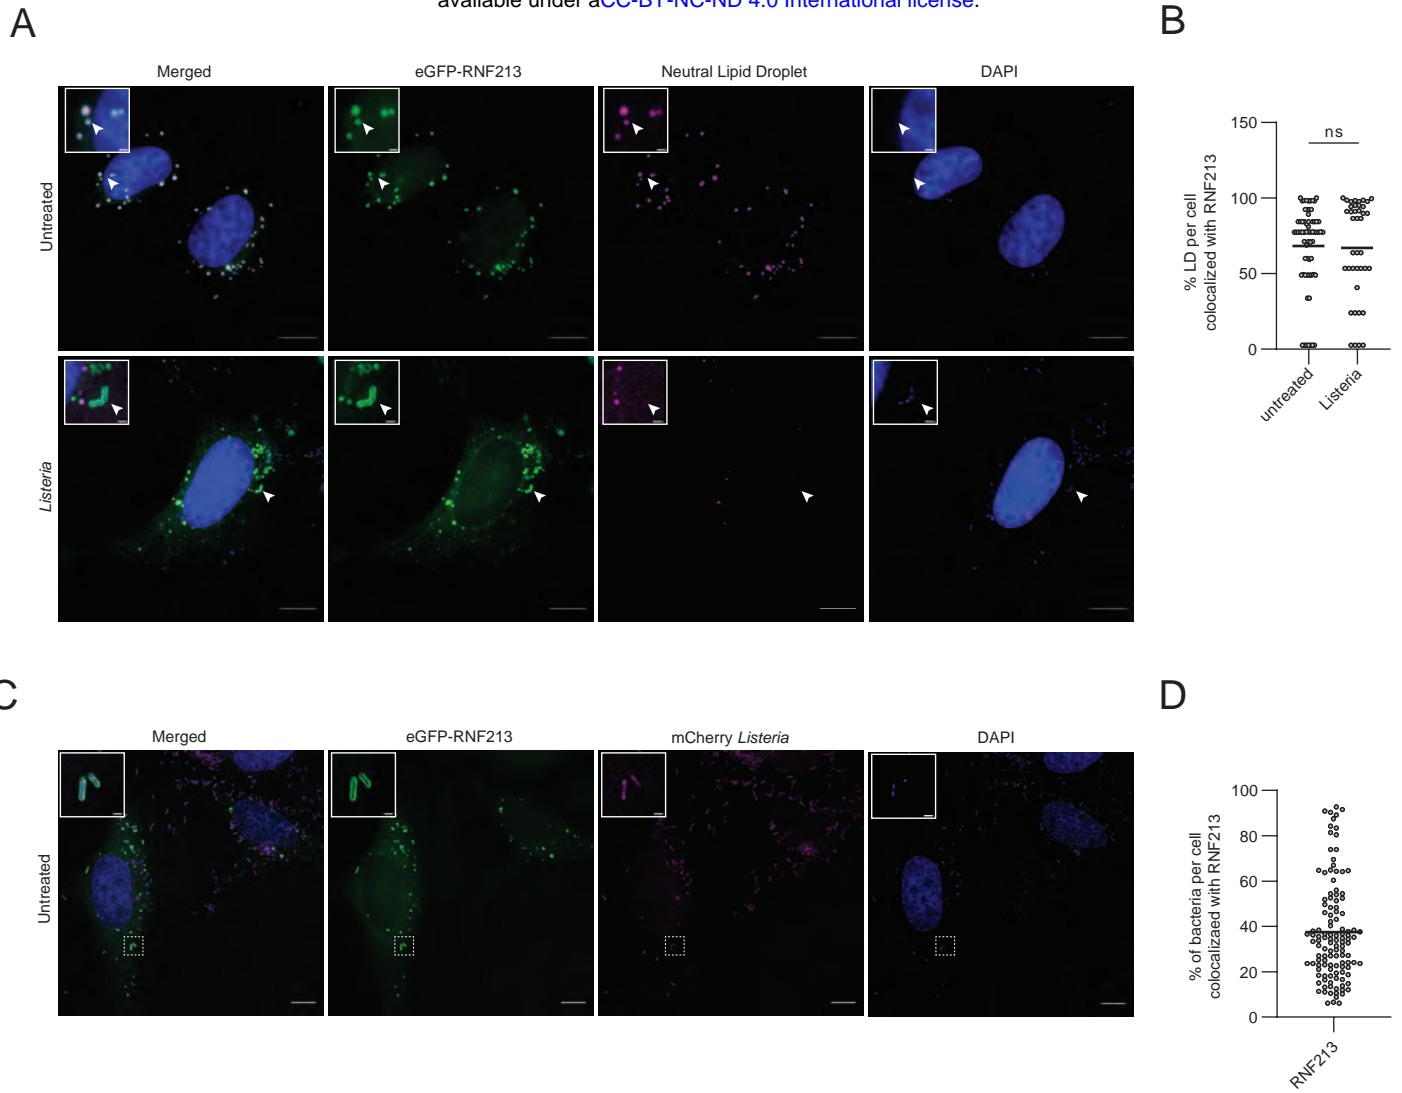

## Figure 7

A

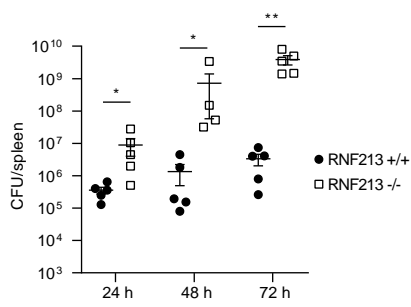

B

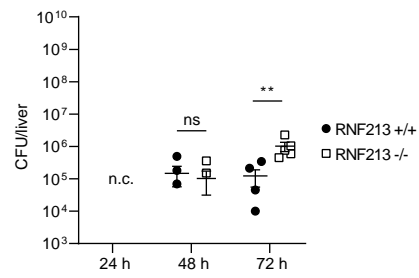

# Figure 8

bioRxiv preprint doi: <https://doi.org/10.1101/2021.06.03.446796>; this version posted June 3, 2021. The copyright holder for this preprint (which was not certified by peer review) is the author/funder, who has granted bioRxiv a license to display the preprint in perpetuity. It is made available under a [CC-BY-NC-ND 4.0 International license](https://creativecommons.org/licenses/by-nc-nd/4.0/).

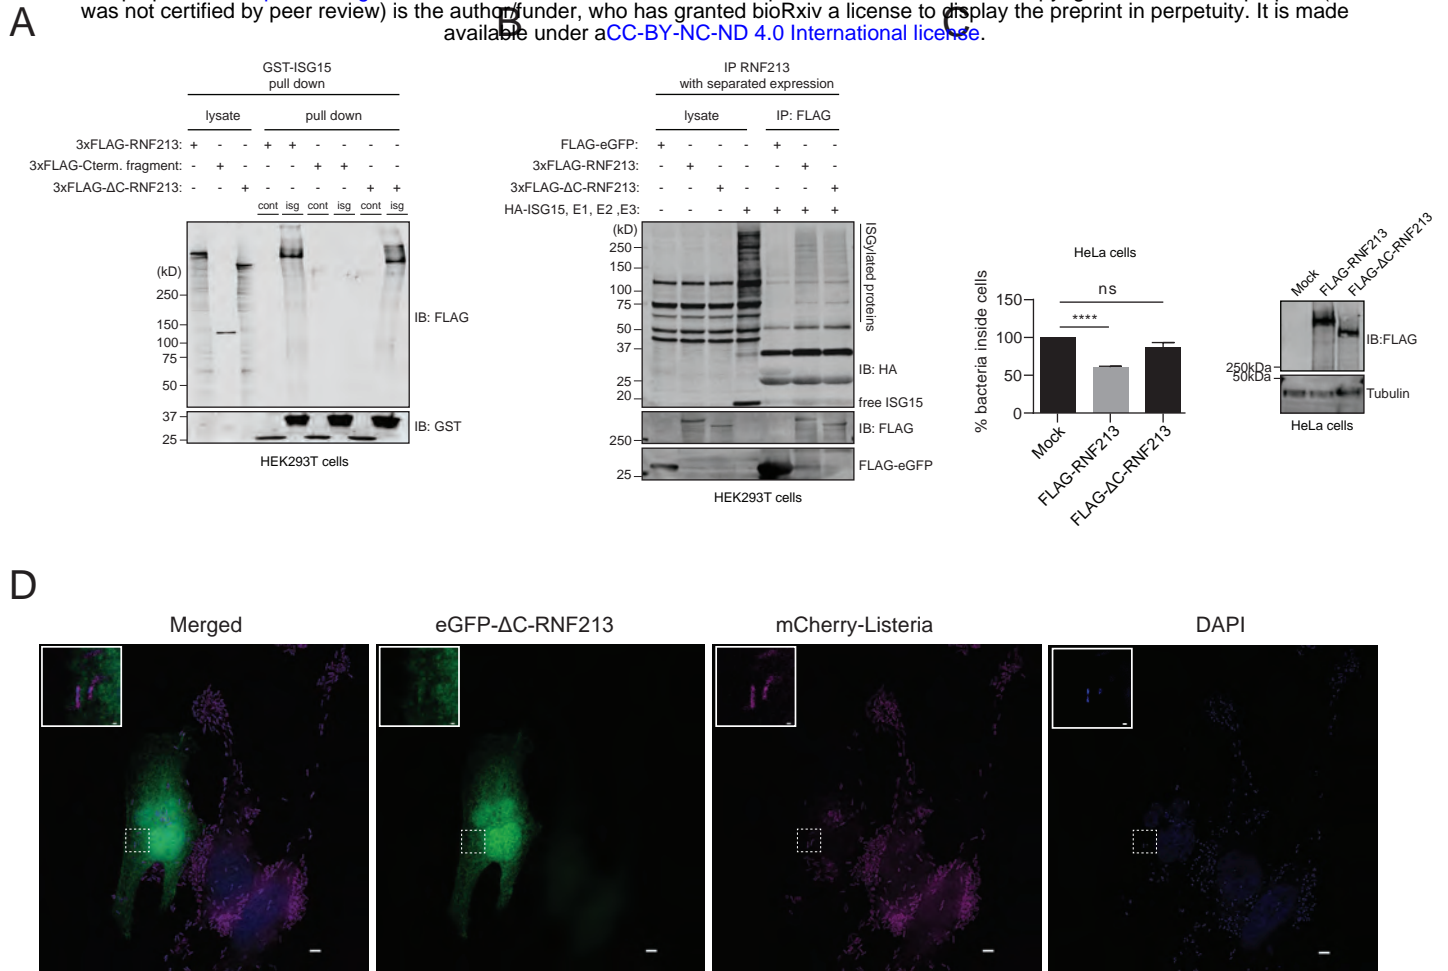

Source: https://www.biorxiv.org/content/biorxiv/early/2021/06/03/2021.06.03.446796.full.pdf
